# Supplementary material for: Transcriptional Profiling of Leucocyte Count Variation from Porcine Peripheral Blood Reveals Differential Gene Expression
Source: Hindawi journal article supplement (doi:10.1155/2018/1496536), 2018-11-18
Supplement: f1 [file 1496536.f1.pdf]

**List of the differentially expressed genes (DEGs) analyzed in qPCR and p**  
**The table reports the gene IDs, gene annotations and sequences of the p**

| <b>Gene</b> | <b>Gene annotation</b>                             | <b>Primers</b>     |
|-------------|----------------------------------------------------|--------------------|
| RSAD2       | radical S-adenosyl methionine domain containing 2  | Forward<br>Reverse |
| S100A12     | S100 calcium binding protein A12                   | Forward<br>Reverse |
| S100A8      | S100 calcium binding protein A8                    | Forward<br>Reverse |
| S100A9      | S100 calcium binding protein A9                    | Forward<br>Reverse |
| SH2D1A      | SH2 domain containing 1A                           | Forward<br>Reverse |
| ISG20       | interferon stimulated exonuclease gene 20          | Forward<br>Reverse |
| TNK2        | tyrosine kinase non receptor 2                     | Forward<br>Reverse |
| OAS1        | 2'-5'-oligoadenylate synthetase 1                  | Forward<br>Reverse |
| PLSCR1      | phospholipid scramblase 1                          | Forward<br>Reverse |
| MX1         | MX dynamin like GTPase 1                           | Forward<br>Reverse |
| MX2         | myxovirus (influenza virus) resistance 2           | Forward<br>Reverse |
| TRIM26      | tripartite motif containing 26                     | Forward<br>Reverse |
| STAT1       | signal transducer and activator of transcription 1 | Forward<br>Reverse |
| TLR4        | toll like receptor 4                               | Forward<br>Reverse |
| ACTB        | actin beta                                         | Forward<br>Reverse |

**primers used for their amplification**

**primer sets used to analyze the expression level of 14 DEGs including the houseke**

**Sequences (5'-3')** **Product length (bp)**

|                         |     |
|-------------------------|-----|
| TATCTGGACATTCTTGCCAT    | 172 |
| CATTGAAGCGATTGATGACT    |     |
| AAGCAGCTGATCACCAAGGAA   | 169 |
| GGATGTTGTCGTGGGCAGTTA   |     |
| TGCCATTAACCTCCCTCATCGAA | 161 |
| TGATGTCCAGCTCTTTGAACCA  |     |
| AACATCTTCCACCAGTACTCGG  | 242 |
| GTCTTGTGCATCTCCTCGTG    |     |
| GCTATTTGCTGAGGGACA      | 272 |
| TCTTCTTCCTGTAGCACCT     |     |
| TCCCGCCCCTGACTTGACT     | 171 |
| ATGCCTCTTGCCATGTTCCAC   |     |
| AGCACTACCCAGAATGACGAC   | 270 |
| ACCATGACATTGTAGACGTCCT  |     |
| CACAGGTCAAGGAAGCCATC    | 239 |
| TTCCAGCTGTCTCCGAAT      |     |
| AGAGATAGAAATCCAAGCTCC   | 152 |
| CTTTGAAATCTTGCCAACCAC   |     |
| TAGACCTTCCTGGCATCACC    | 225 |
| CCAGATCCGGCTTCGTCA      |     |
| AGCTGATGCCTAAACCCC      | 161 |
| ACCCATCTGCCAGTTTAGAGG   |     |
| CAGAGCTCATGCAGGATACCA   | 262 |
| CTGTAGGTCACGCACTTCCA    |     |
| AAACATAAGGAGCTTGACAG    | 165 |
| CTGATCGTTCTTTGCCACA     |     |
| TTCTACATCAAGTGCCCCTA    | 261 |
| TCAAATTGCACAGTTCCTC     |     |
| GGACTTCGAGCAGGAGATGG    | 233 |
| GCACCGTGTTGGCGTAGAGG    |     |

**eping gene used as reference for normalization.**

## DEGs of increase responders (IR) pigs.

| Probesets ID        | Gene symbol | Log2FC      | P.Value   |
|---------------------|-------------|-------------|-----------|
| Ssc.12431.1.A1_at   | MYO5B       | 4.094010063 | 0.0013816 |
| Ssc.23801.1.S1_at   | RETN        | 3.775808068 | 1.73E-05  |
| Ssc.22354.1.A1_at   | BATF3       | 3.583885491 | 6.33E-05  |
| Ssc.16234.1.S1_at   | TCN1        | 3.08672676  | 0.0013682 |
| Ssc.24144.1.S1_at   | ACVR1B      | 2.945451929 | 0.0191245 |
| Ssc.27433.1.S1_at   | TGM1        | 2.902550062 | 0.0025993 |
| Ssc.5683.1.S1_a_at  | TOR3A       | 2.847993101 | 0.0013934 |
| Ssc.336.1.S1_at     | USP18       | 2.753741214 | 0.0041337 |
| Ssc.30887.1.S1_at   | TNFAIP6     | 2.751127135 | 0.0062499 |
| Ssc.6168.1.S1_at    | ETV7        | 2.63629099  | 0.0034567 |
| Ssc.21.1.S1_s_at    | DDX58       | 2.633643978 | 0.0331971 |
| SscAffx.1.1.S1_at   | ISG20       | 2.626876738 | 0.0002799 |
| Ssc.19643.1.A1_at   | COL4A4      | 2.591341426 | 0.0012444 |
| Ssc.18927.1.S1_at   | MS4A8B      | 2.576071825 | 0.0021085 |
| Ssc.5987.1.A1_at    | RHPN2       | 2.56553957  | 0.0139589 |
| Ssc.21339.1.S1_at   | TRIM21      | 2.48112539  | 0.0005581 |
| Ssc.26300.2.S1_at   | UNC93B1     | 2.451645961 | 0.0003616 |
| Ssc.25255.1.S1_at   | ASRGL1      | 2.424264603 | 0.0047803 |
| Ssc.3012.1.S1_at    | UPP1        | 2.405025147 | 0.000328  |
| Ssc.16250.1.S2_at   | IL1RN       | 2.351002641 | 0.0002723 |
| Ssc.13769.1.S1_at   | LOC728320   | 2.30837594  | 0.0202183 |
| Ssc.9117.1.S1_at    | S100A12     | 2.29901906  | 0.0011094 |
| Ssc.7864.1.A1_at    | IL1RAP      | 2.283415664 | 0.0089265 |
| Ssc.9364.1.S1_at    | EDN1        | 2.276514639 | 0.0174868 |
| Ssc.8997.1.A1_at    | PLTP        | 2.265180047 | 0.0468628 |
| Ssc.6433.1.S1_at    | ZNFX1       | 2.26344443  | 0.0008873 |
| Ssc.6369.1.A1_at    | CSF1        | 2.244841341 | 0.000613  |
| Ssc.14444.3.A1_a_at | ARG2        | 2.240699891 | 0.0002939 |
| Ssc.646.1.S1_at     | CSTA        | 2.193947487 | 0.0144002 |
| Ssc.12781.1.A1_s_at | TLR4        | 2.181352466 | 0.0071606 |
| Ssc.27370.1.S1_at   | SLCO4C1     | 2.140740274 | 0.0025911 |
| Ssc.3452.1.A1_at    | DDX26B      | 2.112435761 | 0.0012773 |
| Ssc.11239.1.A1_at   | DNAJA1      | 2.106150702 | 0.0016209 |
| Ssc.26626.1.S1_at   | VCP1P1      | 2.102766943 | 0.0039332 |
| Ssc.16903.1.S1_at   | DAXX        | 2.102366882 | 0.0038088 |
| Ssc.3706.1.S2_at    | SOD2        | 2.089581753 | 0.0013668 |
| Ssc.12446.1.A1_at   | CASP4       | 2.073749114 | 0.0028251 |
| Ssc.11255.1.A1_at   | ACSL6       | 2.065705133 | 0.0020461 |
| Ssc.21872.1.S1_at   | LOC57228    | 2.051680872 | 0.0054061 |
| Ssc.18272.1.A1_at   | TCIRG1      | 2.048556574 | 0.0003484 |
| AFFX-Ss_IRP_5_at    | RSAD2       | 2.040688035 | 0.0020012 |
| Ssc.2381.1.A1_at    | S100A9      | 2.040081686 | 0.0029864 |
| Ssc.6191.1.S1_at    | DTX3L       | 2.038638755 | 0.0217514 |
| Ssc.30833.1.S1_at   | LOC728830   | 2.03542381  | 0.0454051 |
| Ssc.2688.1.S1_at    | MICALL2     | 2.027719219 | 0.0043606 |
| Ssc.10460.1.S1_at   | CFB         | 2.027045031 | 0.0087569 |
| Ssc.3719.1.S1_at    | TIFA        | 2.026447746 | 0.0394709 |
| Ssc.17100.1.S1_at   | S100A8      | 2.014394236 | 0.0065245 |

|                     |          |              |           |
|---------------------|----------|--------------|-----------|
| Ssc.5026.2.S1_at    | NUDT3    | 2.010212094  | 0.0085915 |
| Ssc.6718.1.S1_at    | C15orf15 | -2.005979087 | 0.0120398 |
| Ssc.21670.1.S1_at   | SYNCRIP  | -2.010710824 | 0.003248  |
| Ssc.6515.1.A1_at    | PSPC1    | -2.018842339 | 0.0005225 |
| Ssc.29439.1.A1_at   | GALNT7   | -2.02168232  | 0.0018225 |
| Ssc.1551.1.S1_at    | PLXND1   | -2.022289184 | 0.0020398 |
| Ssc.18589.3.A1_at   | SH3BGRL2 | -2.033287292 | 0.0104612 |
| Ssc.15404.1.S1_at   | CENPH    | -2.035861073 | 0.0143172 |
| Ssc.8127.1.A1_at    | DDX46    | -2.036150464 | 0.0086573 |
| Ssc.22527.1.A1_at   | PBX3     | -2.036349081 | 0.0004765 |
| Ssc.2543.1.S1_at    | SPOCK2   | -2.03934937  | 0.0005484 |
| Ssc.26709.1.S1_at   | GPR183   | -2.039891943 | 0.0109199 |
| Ssc.2033.1.S1_at    | CRY1     | -2.04160133  | 0.006524  |
| Ssc.19359.2.S1_at   | MBP      | -2.043375158 | 0.0060951 |
| Ssc.10883.2.A1_at   | TNRC6A   | -2.045291132 | 0.0139418 |
| Ssc.24353.1.S1_at   | VRK1     | -2.046572126 | 0.0059335 |
| Ssc.1135.1.A1_at    | PRKAR2B  | -2.048245116 | 0.0244537 |
| Ssc.29140.1.A1_at   | MAN2A1   | -2.049986602 | 0.0045617 |
| Ssc.13482.1.S1_at   | B3GALNT1 | -2.050561769 | 0.0027616 |
| Ssc.15291.1.A1_at   | C5orf23  | -2.064178244 | 0.0066005 |
| Ssc.8658.1.A1_at    | PRKACB   | -2.067927491 | 0.004096  |
| Ssc.1856.1.A1_at    | ACAA2    | -2.069284822 | 0.0009638 |
| Ssc.5470.1.S1_at    | OSBPL8   | -2.070737939 | 0.0077977 |
| Ssc.31017.1.A1_at   | KIAA0776 | -2.097463337 | 0.0040772 |
| Ssc.6338.2.S1_at    | USP1     | -2.097827528 | 0.0238283 |
| Ssc.30164.1.A1_at   | PIP3-E   | -2.102421636 | 0.0146302 |
| Ssc.25162.1.S1_at   | HNRNPA3  | -2.102580581 | 0.0078847 |
| Ssc.2595.1.S1_at    | OSGEPL1  | -2.102902109 | 0.0012683 |
| Ssc.7694.1.A1_at    | TOPBP1   | -2.117791209 | 0.0026656 |
| Ssc.2868.1.S1_at    | PSIP1    | -2.12244046  | 0.013915  |
| Ssc.29750.1.A1_at   | TP53INP1 | -2.122464018 | 0.011099  |
| Ssc.7804.1.A1_at    | LYST     | -2.126372419 | 0.0011373 |
| Ssc.19482.1.A1_at   | ATP8A1   | -2.129651461 | 0.0046621 |
| Ssc.4156.1.A1_at    | OTUD6B   | -2.129743758 | 0.0072188 |
| Ssc.28142.1.A1_at   | PTP4A1   | -2.141055328 | 0.0027745 |
| Ssc.20954.2.S1_a_at | MRPL3    | -2.141289281 | 0.0035853 |
| Ssc.30815.1.A1_at   | SSB      | -2.146225973 | 0.0096212 |
| Ssc.10754.1.A1_at   | PIK3R1   | -2.157076969 | 0.0150847 |
| Ssc.12561.1.A1_at   | BCAT1    | -2.161392271 | 0.0004083 |
| Ssc.7818.1.A1_at    | ABCB10   | -2.168377391 | 0.0114959 |
| Ssc.18849.1.A1_at   | SH2D1A   | -2.171514299 | 0.0263094 |
| Ssc.7093.3.S1_at    | HPSE     | -2.173294466 | 0.0192243 |
| Ssc.16489.1.S1_at   | IL7R     | -2.173602668 | 0.0039252 |
| Ssc.7311.1.A1_at    | TMEM161B | -2.178385257 | 0.0008736 |
| Ssc.6670.2.S1_at    | SLC39A6  | -2.18144959  | 0.006876  |
| Ssc.25221.1.A1_at   | CDC14B   | -2.182606787 | 0.0089044 |
| Ssc.22557.1.A1_at   | C4orf34  | -2.186246645 | 0.006982  |
| Ssc.4196.1.A1_at    | ZBTB44   | -2.193193834 | 0.0152256 |
| Ssc.25265.1.S1_a_at | DHX29    | -2.197702954 | 0.004036  |
| Ssc.14379.1.A1_at   | SLC38A1  | -2.197910359 | 0.0004031 |

|                     |              |              |           |
|---------------------|--------------|--------------|-----------|
| Ssc.16531.1.S1_at   | AGPAT5       | -2.20032609  | 0.0072683 |
| Ssc.12654.1.A1_at   | TNK2         | -2.22714408  | 0.00517   |
| Ssc.11661.2.S1_at   | PPP1CC       | -2.234263929 | 0.0087134 |
| Ssc.8725.1.A1_at    | BCL11B       | -2.238316806 | 0.0018406 |
| Ssc.8475.1.A1_at    | CPSF6        | -2.256213773 | 0.0020609 |
| Ssc.14302.1.A1_at   | APPL1        | -2.264309487 | 0.0041221 |
| Ssc.1429.1.A1_at    | NAP1L1       | -2.266165559 | 0.0008653 |
| Ssc.7980.2.A1_at    | ZNF22        | -2.291982075 | 0.0021043 |
| Ssc.6028.1.S1_at    | OCC-1        | -2.315256177 | 0.003458  |
| Ssc.22060.1.A1_at   | ZKSCAN1      | -2.316335362 | 0.0009387 |
| Ssc.3152.1.A1_at    | MBTD1        | -2.316402597 | 0.0010955 |
| Ssc.11477.3.A1_at   | IMMP2L       | -2.335041117 | 0.004667  |
| Ssc.4141.2.S1_at    | KCTD12       | -2.373766676 | 0.0001845 |
| Ssc.4615.1.A1_at    | MAP4K5       | -2.379905093 | 0.0004649 |
| Ssc.30959.1.A1_at   | KIF7         | -2.394170991 | 0.0026816 |
| Ssc.14221.1.S1_at   | NUDT21       | -2.408870095 | 0.0021898 |
| Ssc.23262.1.A1_s_at | CCDC50       | -2.435005925 | 0.0027183 |
| Ssc.7066.1.S1_at    | MIB1         | -2.435690543 | 0.002331  |
| Ssc.2960.1.A1_at    | ATP11A       | -2.441666038 | 0.0006669 |
| Ssc.8375.1.A1_at    | RNF128       | -2.497337801 | 0.0021142 |
| Ssc.1139.1.A1_at    | SLC4A4       | -2.574216316 | 0.0018849 |
| Ssc.6697.1.S1_at    | SOX4         | -2.646754763 | 0.0003341 |
| Ssc.18388.1.A1_at   | FAM105A      | -2.662498084 | 0.0024997 |
| Ssc.8442.1.A1_at    | STK39        | -2.673397235 | 0.0005608 |
| Ssc.27084.1.S1_at   | GPR37        | -2.71556388  | 0.0201586 |
| Ssc.7438.1.A1_at    | SLC25A24     | -2.717451213 | 0.0023049 |
| Ssc.29623.1.A1_at   | RNF144A      | -2.827412196 | 7.14E-05  |
| Ssc.6662.1.S1_at    | SEMA6D       | -2.835835716 | 0.0022459 |
| Ssc.26573.1.S1_at   | RALGPS2      | -2.839473657 | 0.0005753 |
| Ssc.19640.1.A1_at   | FCER1A       | -3.12968532  | 0.0008637 |
| Ssc.21291.1.A1_at   | LOC100129387 | -3.328739351 | 1.06E-05  |

## DEGs of decrease responder (DR) pigs

| Probesets ID        | Gene Symbol | Log2FC      | P.Value   |
|---------------------|-------------|-------------|-----------|
| AFFX-Ss_IRP_3_at    | RSAD2       | 5.304039196 | 4.38E-06  |
| Ssc.16250.1.S1_at   | IL1RN       | 4.607890743 | 2.10E-06  |
| Ssc.23801.1.S1_at   | RETN        | 4.189068671 | 2.59E-07  |
| SscAffx.1.1.S1_at   | ISG20       | 4.136246536 | 2.52E-05  |
| Ssc.21.1.S1_s_at    | DDX58       | 3.991869073 | 3.02E-05  |
| Ssc.6168.1.S1_at    | ETV7        | 3.88058293  | 5.30E-06  |
| Ssc.9364.1.S1_at    | EDN1        | 3.777566396 | 0.0002311 |
| Ssc.29329.1.A1_at   | DCHS2       | 3.612296848 | 3.52E-06  |
| Ssc.10049.1.A1_at   | HIATL1      | 3.612275169 | 2.72E-05  |
| Ssc.16103.1.S1_s_at | CRISP2      | 3.585440168 | 2.49E-06  |
| Ssc.12781.1.A1_at   | TLR4        | 3.56217798  | 0.0003162 |
| Ssc.336.1.S1_at     | USP18       | 3.503408736 | 1.63E-06  |
| Ssc.5145.2.S1_at    | HSPA1A      | 3.50026051  | 0.0001242 |
| Ssc.12918.1.S1_at   | NMI         | 3.462458124 | 6.28E-06  |
| Ssc.12431.1.A1_at   | MYO5B       | 3.448634305 | 1.13E-06  |
| Ssc.12829.1.A1_at   | TNFSF10     | 3.446131328 | 2.13E-05  |
| Ssc.22620.1.S1_at   | IFIT2       | 3.342441365 | 0.0001696 |
| Ssc.26005.1.S1_at   | ZBP1        | 3.290758751 | 4.17E-05  |
| Ssc.10460.1.S1_at   | CFB         | 3.234609347 | 7.39E-06  |
| Ssc.18948.1.S1_at   | SAA1        | 3.220900679 | 4.83E-05  |
| Ssc.8261.1.A1_at    | CYP2C9      | 3.185045357 | 4.00E-05  |
| Ssc.1024.1.S1_at    | SNTB1       | 3.124389094 | 4.99E-06  |
| Ssc.21339.1.S1_at   | TRIM21      | 3.098573375 | 1.86E-06  |
| Ssc.24144.1.S1_at   | ACVR1B      | 3.09324303  | 2.90E-06  |
| Ssc.28988.1.S1_at   | CNP         | 3.048814653 | 1.48E-05  |
| Ssc.220.1.A1_at     | MX2         | 3.048585713 | 3.92E-06  |
| Ssc.5683.1.S1_a_at  | TOR3A       | 3.031097096 | 3.28E-06  |
| Ssc.1031.1.S1_at    | OAS1        | 3.02325665  | 0.0014731 |
| Ssc.3719.1.S1_at    | TIFA        | 3.022718635 | 8.19E-06  |
| Ssc.6433.2.S1_at    | ZNFX1       | 3.009727117 | 2.87E-05  |
| Ssc.26300.2.S1_at   | UNC93B1     | 3.001128127 | 1.06E-05  |
| Ssc.25739.1.S1_at   | IRF7        | 2.990352599 | 0.0002388 |
| Ssc.25255.2.S1_a_at | ASRGL1      | 2.969042504 | 1.48E-05  |
| Ssc.7864.1.A1_at    | IL1RAP      | 2.950173737 | 5.50E-05  |
| Ssc.3706.1.S1_at    | SOD2        | 2.917184637 | 0.0001097 |
| Ssc.6191.1.S1_at    | DTX3L       | 2.893128585 | 5.00E-05  |
| Ssc.17458.1.S1_at   | DMXL2       | 2.892959645 | 1.56E-05  |
| Ssc.8473.1.S2_at    | DNAJA1      | 2.869401235 | 2.01E-05  |
| Ssc.20294.1.S1_at   | LOC441108   | 2.856935225 | 0.0001261 |
| Ssc.221.1.S1_at     | MX1         | 2.84932932  | 0.0001138 |
| Ssc.2688.1.S1_at    | MICALL2     | 2.79466907  | 7.81E-06  |
| Ssc.22354.1.A1_at   | BATF3       | 2.789114722 | 1.95E-05  |
| Ssc.3773.1.S1_at    | CASP7       | 2.787177913 | 7.09E-05  |
| Ssc.30869.1.S1_at   | BAT2D1      | 2.787034965 | 6.34E-06  |
| Ssc.12446.1.A1_at   | CASP4       | 2.780595846 | 5.37E-05  |
| Ssc.19763.1.S1_at   | MED25       | 2.777765326 | 1.35E-05  |
| Ssc.27433.1.S1_at   | TGM1        | 2.702362685 | 2.50E-05  |

|                    |              |             |           |
|--------------------|--------------|-------------|-----------|
| Ssc.16903.1.S1_at  | DAXX         | 2.658093543 | 2.11E-05  |
| Ssc.23929.1.A1_at  | PLSCR1       | 2.649541185 | 0.0002822 |
| Ssc.12756.1.A1_at  | RHBDD1       | 2.625583586 | 5.79E-05  |
| Ssc.5987.1.A1_at   | RHPN2        | 2.622995058 | 0.0001273 |
| Ssc.2101.1.S1_at   | FTSJD2       | 2.580575907 | 1.10E-05  |
| Ssc.1217.1.S1_at   | PHF11        | 2.55770657  | 5.99E-05  |
| Ssc.5743.2.A1_at   | HK3          | 2.555131292 | 7.74E-05  |
| Ssc.18272.1.A1_at  | TCIRG1       | 2.532974141 | 3.93E-05  |
| Ssc.2572.1.S1_at   | PPA1         | 2.520763901 | 4.63E-05  |
| Ssc.28913.1.A1_at  | GNB4         | 2.500590752 | 0.0001373 |
| Ssc.30887.1.S1_at  | TNFAIP6      | 2.500090028 | 0.0004409 |
| Ssc.17902.1.A1_at  | TDRD7        | 2.496948075 | 8.25E-05  |
| Ssc.31140.1.S1_at  | IFIT3        | 2.487025366 | 0.000551  |
| Ssc.5026.2.S1_at   | NUDT3        | 2.462542251 | 6.35E-05  |
| Ssc.26626.1.S1_at  | VCPIP1       | 2.44946814  | 0.000478  |
| Ssc.6371.1.A1_at   | LOC100128809 | 2.434853412 | 0.0009363 |
| Ssc.61.1.S1_at     | LOC100133511 | 2.432919412 | 0.0001133 |
| Ssc.12191.1.A1_at  | HSP90AA1     | 2.429984935 | 0.0011778 |
| Ssc.6025.1.S1_at   | STAT1        | 2.382102727 | 0.0002681 |
| Ssc.7812.1.A1_at   | STK3         | 2.375086455 | 0.0002588 |
| Ssc.30724.1.S1_at  | HERC6        | 2.3708887   | 5.60E-05  |
| Ssc.20062.1.A1_at  | TRAFD1       | 2.343454831 | 8.65E-05  |
| Ssc.1143.3.S1_a_at | ANXA4        | 2.342817772 | 0.0009567 |
| Ssc.12795.1.S1_at  | TREX1        | 2.338074527 | 4.80E-05  |
| Ssc.851.1.A1_at    | ETV6         | 2.328742522 | 9.14E-05  |
| Ssc.11557.1.A1_at  | ISG15        | 2.328164413 | 0.0001577 |
| Ssc.14244.1.A1_at  | UBR1         | 2.313542395 | 4.10E-05  |
| Ssc.29054.2.S1_at  | GBP3         | 2.24764538  | 0.000295  |
| Ssc.20734.1.S1_at  | TRIM26       | 2.24699274  | 6.53E-05  |
| Ssc.5228.1.S1_at   | LGALS8       | 2.23855834  | 0.0010148 |
| Ssc.7224.1.A1_at   | LBA1         | 2.237173582 | 0.0005455 |
| Ssc.9733.1.S1_at   | MORC3        | 2.234646715 | 0.0001624 |
| Ssc.3214.2.S1_at   | RNASET2      | 2.228646277 | 0.0001694 |
| Ssc.4466.1.S1_at   | TEC          | 2.22678257  | 6.88E-05  |
| Ssc.646.1.S1_at    | CSTA         | 2.224037011 | 7.38E-05  |
| Ssc.10593.2.A1_at  | IFI44L       | 2.221457918 | 0.0007915 |
| Ssc.18586.1.A1_at  | MAD2L2       | 2.214654584 | 9.68E-05  |
| Ssc.29301.1.A1_at  | C19orf66     | 2.200862762 | 8.63E-05  |
| Ssc.24652.1.S1_at  | PAK1         | 2.200493001 | 0.0005028 |
| Ssc.13226.1.A1_at  | PARP9        | 2.19461663  | 0.0001456 |
| Ssc.864.1.S1_at    | CFH          | 2.191332109 | 0.000781  |
| Ssc.3012.1.S1_at   | UPP1         | 2.187162871 | 0.0007884 |
| Ssc.17245.1.S1_at  | IL13RA1      | 2.169024933 | 0.0010022 |
| Ssc.6906.1.A1_at   | FNDC3A       | 2.164539785 | 8.74E-05  |
| Ssc.2140.1.S1_at   | PTK2B        | 2.156304441 | 0.0001676 |
| Ssc.15306.1.S1_at  | GGH          | 2.150927794 | 0.000444  |
| Ssc.15720.1.A1_at  | CNDP2        | 2.150044034 | 0.0002102 |
| Ssc.5685.1.S1_at   | ANKFY1       | 2.149556871 | 6.43E-05  |
| Ssc.7274.1.A1_at   | EIF2AK2      | 2.147600506 | 0.0001628 |
| Ssc.28568.1.A1_at  | PDE12        | 2.128312555 | 0.0004581 |

|                     |          |              |           |
|---------------------|----------|--------------|-----------|
| Ssc.18805.1.A1_at   | RNASEL   | 2.118799269  | 0.0002826 |
| Ssc.9766.3.A1_a_at  | C21orf66 | 2.107058612  | 0.0005327 |
| Ssc.5119.1.S1_at    | SLC25A28 | 2.090947508  | 0.0002869 |
| Ssc.11079.1.A1_at   | RNASE4   | 2.089285582  | 0.0020863 |
| Ssc.27370.1.S1_at   | SLCO4C1  | 2.083427522  | 0.0010761 |
| Ssc.12286.2.A1_at   | PML      | 2.082013935  | 0.0001604 |
| Ssc.1755.2.A1_at    | NANS     | 2.079042436  | 8.78E-05  |
| Ssc.4539.1.S1_at    | WHSC1L1  | 2.076160546  | 9.55E-05  |
| Ssc.30665.1.S1_at   | C4orf32  | 2.059887921  | 0.0024497 |
| Ssc.27135.1.A1_at   | FOXS1    | 2.037541071  | 0.0001171 |
| Ssc.26216.2.A1_at   | SOCS1    | 2.033052315  | 0.0003359 |
| Ssc.6172.1.S1_at    | XAF1     | 2.033018111  | 0.0006778 |
| Ssc.607.1.S1_at     | SLC2A3   | 2.019934252  | 0.0003884 |
| Ssc.7914.1.S1_at    | USP25    | 2.013635109  | 0.000133  |
| Ssc.26085.1.S1_at   | STARD8   | 2.006793086  | 0.000136  |
| Ssc.114.1.S1_at     | HSPA6    | 2.004611159  | 0.0009547 |
| Ssc.18929.1.S1_s_at | RNF128   | -2.003792106 | 0.0105651 |
| Ssc.18897.1.S1_at   | FAM135A  | -2.034994174 | 0.0035609 |
| Ssc.29623.1.A1_at   | RNF144A  | -2.064918029 | 0.0136457 |
| Ssc.1551.1.S1_at    | PLXND1   | -2.070062125 | 0.0017693 |
| Ssc.7804.1.A1_at    | LYST     | -2.168759659 | 0.0053664 |
| Ssc.25324.1.S1_at   | DMD      | -2.172729073 | 0.0050767 |
| Ssc.17560.1.S1_at   | GPR177   | -2.21419904  | 0.0003118 |
| Ssc.9471.1.A1_at    | FAM108C1 | -2.232825136 | 0.0071804 |
| Ssc.15640.1.S1_at   | MT2A     | -2.24214614  | 0.0002325 |
| Ssc.14467.2.S1_a_at | AREGB    | -2.345459599 | 0.0001729 |
| Ssc.5453.1.A1_at    | QPCT     | -2.345676288 | 0.000809  |
| Ssc.14361.1.A1_at   | OLFM1    | -2.360937863 | 0.0007601 |
| Ssc.15291.1.A1_at   | C5orf23  | -2.4029174   | 0.0004558 |
| Ssc.18388.1.A1_at   | FAM105A  | -2.423988618 | 5.14E-05  |
| Ssc.6974.1.A1_at    | SYTL2    | -2.436128846 | 0.0012614 |
| Ssc.4103.1.A1_at    | FNDC3B   | -2.471305808 | 0.0005948 |
| Ssc.28522.1.S1_at   | SEPN1    | -2.524221234 | 0.0003246 |
| Ssc.1320.1.A1_at    | LGALS1   | -2.556338238 | 5.31E-05  |
| Ssc.420.4.S1_a_at   | CAMP     | -2.635386044 | 0.0003765 |
| Ssc.9957.1.A1_at    | CCL8     | -2.699671486 | 0.002129  |
| Ssc.8767.1.A1_at    | CYP1B1   | -3.273345691 | 7.32E-06  |
| Ssc.31189.1.S1_at   | CHPT1    | -3.786627776 | 3.02E-06  |
| Ssc.16671.1.S1_at   | TGFBI    | -3.907514613 | 0.0006281 |

## DEGs specific to IR pigs

| Probesets ID        | Gene Symbol | Log2FC   | P.Value     |
|---------------------|-------------|----------|-------------|
| Ssc.16234.1.S1_at   | TCN1        | 3.086727 | 0.001368227 |
| Ssc.19643.1.A1_at   | COL4A4      | 2.591341 | 0.001244406 |
| Ssc.18927.1.S1_at   | MS4A8B      | 2.576072 | 0.002108541 |
| Ssc.13769.1.S1_at   | LOC728320   | 2.308376 | 0.020218299 |
| Ssc.9117.1.S1_at    | S100A12     | 2.299019 | 0.001109425 |
| Ssc.8997.1.A1_at    | PLTP        | 2.26518  | 0.046862824 |
| Ssc.6369.1.A1_at    | CSF1        | 2.244841 | 0.000612965 |
| Ssc.14444.3.A1_a_at | ARG2        | 2.2407   | 0.000293894 |
| Ssc.3452.1.A1_at    | DDX26B      | 2.112436 | 0.001277341 |
| Ssc.11255.1.A1_at   | ACSL6       | 2.065705 | 0.002046089 |
| Ssc.21872.1.S1_at   | LOC57228    | 2.051681 | 0.005406147 |
| Ssc.2381.1.A1_at    | S100A9      | 2.040082 | 0.002986434 |
| Ssc.30833.1.S1_at   | LOC728830   | 2.035424 | 0.045405056 |
| Ssc.17100.1.S1_at   | S100A8      | 2.014394 | 0.006524463 |
| Ssc.6718.1.S1_at    | C15orf15    | -2.00598 | 0.012039775 |
| Ssc.21670.1.S1_at   | SYNCRIP     | -2.01071 | 0.00324796  |
| Ssc.6515.1.A1_at    | PSPC1       | -2.01884 | 0.000522464 |
| Ssc.29439.1.A1_at   | GALNT7      | -2.02168 | 0.001822546 |
| Ssc.18589.3.A1_at   | SH3BGRL2    | -2.03329 | 0.010461162 |
| Ssc.15404.1.S1_at   | CENPH       | -2.03586 | 0.014317222 |
| Ssc.8127.1.A1_at    | DDX46       | -2.03615 | 0.008657343 |
| Ssc.22527.1.A1_at   | PBX3        | -2.03635 | 0.000476487 |
| Ssc.2543.1.S1_at    | SPOCK2      | -2.03935 | 0.000548417 |
| Ssc.26709.1.S1_at   | GPR183      | -2.03989 | 0.010919886 |
| Ssc.2033.1.S1_at    | CRY1        | -2.0416  | 0.006524039 |
| Ssc.19359.2.S1_at   | MBP         | -2.04338 | 0.006095099 |
| Ssc.10883.2.A1_at   | TNRC6A      | -2.04529 | 0.013941795 |
| Ssc.24353.1.S1_at   | VRK1        | -2.04657 | 0.005933548 |
| Ssc.1135.1.A1_at    | PRKAR2B     | -2.04825 | 0.024453749 |
| Ssc.29140.1.A1_at   | MAN2A1      | -2.04999 | 0.004561666 |
| Ssc.13482.1.S1_at   | B3GALNT1    | -2.05056 | 0.002761565 |
| Ssc.8658.1.A1_at    | PRKACB      | -2.06793 | 0.004095972 |
| Ssc.1856.1.A1_at    | ACAA2       | -2.06928 | 0.000963763 |
| Ssc.5470.1.S1_at    | OSBPL8      | -2.07074 | 0.007797738 |
| Ssc.31017.1.A1_at   | KIAA0776    | -2.09746 | 0.00407719  |
| Ssc.6338.2.S1_at    | USP1        | -2.09783 | 0.023828316 |
| Ssc.30164.1.A1_at   | PIP3-E      | -2.10242 | 0.014630199 |
| Ssc.25162.1.S1_at   | HNRNPA3     | -2.10258 | 0.0078847   |
| Ssc.2595.1.S1_at    | OSGEPL1     | -2.1029  | 0.001268252 |
| Ssc.7694.1.A1_at    | TOPBP1      | -2.11779 | 0.002665552 |
| Ssc.2868.1.S1_at    | PSIP1       | -2.12244 | 0.013914951 |
| Ssc.29750.1.A1_at   | TP53INP1    | -2.12246 | 0.011098953 |
| Ssc.19482.1.A1_at   | ATP8A1      | -2.12965 | 0.00466214  |
| Ssc.4156.1.A1_at    | OTUD6B      | -2.12974 | 0.007218834 |
| Ssc.28142.1.A1_at   | PTP4A1      | -2.14106 | 0.002774463 |
| Ssc.20954.2.S1_a_at | MRPL3       | -2.14129 | 0.003585323 |
| Ssc.30815.1.A1_at   | SSB         | -2.14623 | 0.009621241 |

|                     |              |          |             |
|---------------------|--------------|----------|-------------|
| Ssc.10754.1.A1_at   | PIK3R1       | -2.15708 | 0.015084659 |
| Ssc.12561.1.A1_at   | BCAT1        | -2.16139 | 0.00040826  |
| Ssc.7818.1.A1_at    | ABCB10       | -2.16838 | 0.011495856 |
| Ssc.18849.1.A1_at   | SH2D1A       | -2.17151 | 0.026309448 |
| Ssc.7093.3.S1_at    | HPSE         | -2.17329 | 0.019224287 |
| Ssc.16489.1.S1_at   | IL7R         | -2.1736  | 0.003925216 |
| Ssc.7311.1.A1_at    | TMEM161B     | -2.17839 | 0.000873618 |
| Ssc.6670.2.S1_at    | SLC39A6      | -2.18145 | 0.006875997 |
| Ssc.25221.1.A1_at   | CDC14B       | -2.18261 | 0.008904415 |
| Ssc.22557.1.A1_at   | C4orf34      | -2.18625 | 0.006982027 |
| Ssc.4196.1.A1_at    | ZBTB44       | -2.19319 | 0.01522565  |
| Ssc.25265.1.S1_a_at | DHX29        | -2.1977  | 0.004035962 |
| Ssc.14379.1.A1_at   | SLC38A1      | -2.19791 | 0.000403112 |
| Ssc.16531.1.S1_at   | AGPAT5       | -2.20033 | 0.007268285 |
| Ssc.12654.1.A1_at   | TNK2         | -2.22714 | 0.005170009 |
| Ssc.11661.2.S1_at   | PPP1CC       | -2.23426 | 0.008713381 |
| Ssc.8725.1.A1_at    | BCL11B       | -2.23832 | 0.001840612 |
| Ssc.8475.1.A1_at    | CPSF6        | -2.25621 | 0.002060896 |
| Ssc.14302.1.A1_at   | APPL1        | -2.26431 | 0.004122061 |
| Ssc.1429.1.A1_at    | NAP1L1       | -2.26617 | 0.000865253 |
| Ssc.7980.2.A1_at    | ZNF22        | -2.29198 | 0.002104305 |
| Ssc.6028.1.S1_at    | OCC-1        | -2.31526 | 0.003458    |
| Ssc.22060.1.A1_at   | ZKSCAN1      | -2.31634 | 0.000938701 |
| Ssc.3152.1.A1_at    | MBTD1        | -2.3164  | 0.001095543 |
| Ssc.11477.3.A1_at   | IMMP2L       | -2.33504 | 0.004666992 |
| Ssc.4141.2.S1_at    | KCTD12       | -2.37377 | 0.00018453  |
| Ssc.4615.1.A1_at    | MAP4K5       | -2.37991 | 0.000464922 |
| Ssc.30959.1.A1_at   | KIF7         | -2.39417 | 0.002681566 |
| Ssc.14221.1.S1_at   | NUDT21       | -2.40887 | 0.002189772 |
| Ssc.23262.1.A1_s_at | CCDC50       | -2.43501 | 0.00271826  |
| Ssc.7066.1.S1_at    | MIB1         | -2.43569 | 0.002331006 |
| Ssc.2960.1.A1_at    | ATP11A       | -2.44167 | 0.000666856 |
| Ssc.1139.1.A1_at    | SLC4A4       | -2.57422 | 0.001884852 |
| Ssc.6697.1.S1_at    | SOX4         | -2.64675 | 0.0003341   |
| Ssc.8442.1.A1_at    | STK39        | -2.6734  | 0.000560791 |
| Ssc.27084.1.S1_at   | GPR37        | -2.71556 | 0.020158616 |
| Ssc.7438.1.A1_at    | SLC25A24     | -2.71745 | 0.002304912 |
| Ssc.6662.1.S1_at    | SEMA6D       | -2.83584 | 0.002245909 |
| Ssc.26573.1.S1_at   | RALGPS2      | -2.83947 | 0.000575254 |
| Ssc.19640.1.A1_at   | FCER1A       | -3.12969 | 0.000863742 |
| Ssc.21291.1.A1_at   | LOC100129387 | -3.32874 | 1.05948E-05 |

## DEGs specific to DR pigs

| Probesets ID        | Gene Symbol  | Log2FC      | P.Value     |
|---------------------|--------------|-------------|-------------|
| Ssc.29329.1.A1_at   | DCHS2        | 3.612296848 | 0.00000352  |
| Ssc.10049.1.A1_at   | HIATL1       | 3.612275169 | 0.0000272   |
| Ssc.16103.1.S1_s_at | CRISP2       | 3.585440168 | 0.00000249  |
| Ssc.5145.2.S1_at    | HSPA1A       | 3.50026051  | 0.000124206 |
| Ssc.12918.1.S1_at   | NMI          | 3.462458124 | 0.00000628  |
| Ssc.12829.1.A1_at   | TNFSF10      | 3.446131328 | 0.0000213   |
| Ssc.22620.1.S1_at   | IFIT2        | 3.342441365 | 0.000169642 |
| Ssc.26005.1.S1_at   | ZBP1         | 3.290758751 | 0.0000417   |
| Ssc.18948.1.S1_at   | SAA1         | 3.220900679 | 0.0000483   |
| Ssc.8261.1.A1_at    | CYP2C9       | 3.185045357 | 0.00004     |
| Ssc.1024.1.S1_at    | SNTB1        | 3.124389094 | 0.00000499  |
| Ssc.28988.1.S1_at   | CNP          | 3.048814653 | 0.0000148   |
| Ssc.220.1.A1_at     | MX2          | 3.048585713 | 0.00000392  |
| Ssc.1031.1.S1_at    | OAS1         | 3.02325665  | 0.001473091 |
| Ssc.25739.1.S1_at   | IRF7         | 2.990352599 | 0.000238757 |
| Ssc.17458.1.S1_at   | DMXL2        | 2.892959645 | 0.0000156   |
| Ssc.20294.1.S1_at   | LOC441108    | 2.856935225 | 0.000126126 |
| Ssc.221.1.S1_at     | MX1          | 2.84932932  | 0.000113757 |
| Ssc.3773.1.S1_at    | CASP7        | 2.787177913 | 0.0000709   |
| Ssc.30869.1.S1_at   | BAT2D1       | 2.787034965 | 0.00000634  |
| Ssc.19763.1.S1_at   | MED25        | 2.777765326 | 0.0000135   |
| Ssc.23929.1.A1_at   | PLSCR1       | 2.649541185 | 0.000282237 |
| Ssc.12756.1.A1_at   | RHBDD1       | 2.625583586 | 0.0000579   |
| Ssc.2101.1.S1_at    | FTSJD2       | 2.580575907 | 0.000011    |
| Ssc.1217.1.S1_at    | PHF11        | 2.55770657  | 0.0000599   |
| Ssc.5743.2.A1_at    | HK3          | 2.555131292 | 0.0000774   |
| Ssc.2572.1.S1_at    | PPA1         | 2.520763901 | 0.0000463   |
| Ssc.28913.1.A1_at   | GNB4         | 2.500590752 | 0.000137313 |
| Ssc.17902.1.A1_at   | TDRD7        | 2.496948075 | 0.0000825   |
| Ssc.31140.1.S1_at   | IFIT3        | 2.487025366 | 0.000551044 |
| Ssc.6371.1.A1_at    | LOC100128809 | 2.434853412 | 0.000936319 |
| Ssc.61.1.S1_at      | LOC100133511 | 2.432919412 | 0.000113282 |
| Ssc.12191.1.A1_at   | HSP90AA1     | 2.429984935 | 0.00117776  |
| Ssc.6025.1.S1_at    | STAT1        | 2.382102727 | 0.000268057 |
| Ssc.7812.1.A1_at    | STK3         | 2.375086455 | 0.000258799 |
| Ssc.30724.1.S1_at   | HERC6        | 2.3708887   | 0.000056    |
| Ssc.20062.1.A1_at   | TRAFD1       | 2.343454831 | 0.0000865   |
| Ssc.1143.3.S1_a_at  | ANXA4        | 2.342817772 | 0.000956712 |
| Ssc.12795.1.S1_at   | TREX1        | 2.338074527 | 0.000048    |
| Ssc.851.1.A1_at     | ETV6         | 2.328742522 | 0.0000914   |
| Ssc.11557.1.A1_at   | ISG15        | 2.328164413 | 0.000157715 |
| Ssc.14244.1.A1_at   | UBR1         | 2.313542395 | 0.000041    |
| Ssc.29054.2.S1_at   | GBP3         | 2.24764538  | 0.000294965 |
| Ssc.20734.1.S1_at   | TRIM26       | 2.24699274  | 0.0000653   |

|                     |          |             |             |
|---------------------|----------|-------------|-------------|
| Ssc.5228.1.S1_at    | LGALS8   | 2.23855834  | 0.001014778 |
| Ssc.7224.1.A1_at    | LBA1     | 2.237173582 | 0.0005455   |
| Ssc.9733.1.S1_at    | MORC3    | 2.234646715 | 0.000162423 |
| Ssc.3214.2.S1_at    | RNASSET2 | 2.228646277 | 0.000169358 |
| Ssc.4466.1.S1_at    | TEC      | 2.22678257  | 0.0000688   |
| Ssc.10593.2.A1_at   | IFI44L   | 2.221457918 | 0.000791496 |
| Ssc.18586.1.A1_at   | MAD2L2   | 2.214654584 | 0.0000968   |
| Ssc.29301.1.A1_at   | C19orf66 | 2.200862762 | 0.0000863   |
| Ssc.24652.1.S1_at   | PAK1     | 2.200493001 | 0.000502759 |
| Ssc.13226.1.A1_at   | PARP9    | 2.19461663  | 0.00014557  |
| Ssc.864.1.S1_at     | CFH      | 2.191332109 | 0.00078102  |
| Ssc.17245.1.S1_at   | IL13RA1  | 2.169024933 | 0.001002163 |
| Ssc.6906.1.A1_at    | FNDC3A   | 2.164539785 | 0.0000874   |
| Ssc.2140.1.S1_at    | PTK2B    | 2.156304441 | 0.000167589 |
| Ssc.15306.1.S1_at   | GGH      | 2.150927794 | 0.000444033 |
| Ssc.15720.1.A1_at   | CNDP2    | 2.150044034 | 0.00021024  |
| Ssc.5685.1.S1_at    | ANKFY1   | 2.149556871 | 0.0000643   |
| Ssc.7274.1.A1_at    | EIF2AK2  | 2.147600506 | 0.000162774 |
| Ssc.28568.1.A1_at   | PDE12    | 2.128312555 | 0.000458148 |
| Ssc.18805.1.A1_at   | RNASSEL  | 2.118799269 | 0.000282558 |
| Ssc.9766.3.A1_a_at  | C21orf66 | 2.107058612 | 0.00053266  |
| Ssc.5119.1.S1_at    | SLC25A28 | 2.090947508 | 0.000286903 |
| Ssc.11079.1.A1_at   | RNASE4   | 2.089285582 | 0.002086332 |
| Ssc.12286.2.A1_at   | PML      | 2.082013935 | 0.000160413 |
| Ssc.1755.2.A1_at    | NANS     | 2.079042436 | 0.0000878   |
| Ssc.4539.1.S1_at    | WHSC1L1  | 2.076160546 | 0.0000955   |
| Ssc.30665.1.S1_at   | C4orf32  | 2.059887921 | 0.00244974  |
| Ssc.27135.1.A1_at   | FOXS1    | 2.037541071 | 0.000117062 |
| Ssc.26216.2.A1_at   | SOCS1    | 2.033052315 | 0.000335924 |
| Ssc.6172.1.S1_at    | XAF1     | 2.033018111 | 0.000677779 |
| Ssc.607.1.S1_at     | SLC2A3   | 2.019934252 | 0.000388423 |
| Ssc.7914.1.S1_at    | USP25    | 2.013635109 | 0.000133014 |
| Ssc.26085.1.S1_at   | STARD8   | 2.006793086 | 0.000135999 |
| Ssc.114.1.S1_at     | HSPA6    | 2.004611159 | 0.0009547   |
| Ssc.18897.1.S1_at   | FAM135A  | -2.03499417 | 0.003560866 |
| Ssc.25324.1.S1_at   | DMD      | -2.17272907 | 0.005076748 |
| Ssc.17560.1.S1_at   | GPR177   | -2.21419904 | 0.000311829 |
| Ssc.9471.1.A1_at    | FAM108C1 | -2.23282514 | 0.007180429 |
| Ssc.15640.1.S1_at   | MT2A     | -2.24214614 | 0.000232527 |
| Ssc.14467.2.S1_a_at | AREGB    | -2.3454596  | 0.000172886 |
| Ssc.5453.1.A1_at    | QPCT     | -2.34567629 | 0.000809025 |
| Ssc.14361.1.A1_at   | OLFM1    | -2.36093786 | 0.000760094 |
| Ssc.6974.1.A1_at    | SYTL2    | -2.43612885 | 0.001261386 |
| Ssc.4103.1.A1_at    | FNDC3B   | -2.47130581 | 0.000594768 |
| Ssc.28522.1.S1_at   | SEPN1    | -2.52422123 | 0.00032463  |
| Ssc.1320.1.A1_at    | LGALS1   | -2.55633824 | 0.0000531   |
| Ssc.420.4.S1_a_at   | CAMP     | -2.63538604 | 0.000376522 |

|                   |        |             |            |
|-------------------|--------|-------------|------------|
| Ssc.9957.1.A1_at  | CCL8   | -2.69967149 | 0.00212902 |
| Ssc.8767.1.A1_at  | CYP1B1 | -3.27334569 | 0.00000732 |
| Ssc.31189.1.S1_at | CHPT1  | -3.78662778 | 0.00000302 |
| Ssc.16671.1.S1_at | TGFBI  | -3.90751461 | 0.00062813 |

## Common DEGs between IR and DR pigs

35 common elements in "IR Vs DR upregulated genes"

MYO5B  
RETN  
BATF3  
ACVR1B  
TGM1  
TOR3A  
USP18  
TNFAIP6  
ETV7  
DDX58  
ISG20  
RHPN2  
TRIM21  
UNC93B1  
ASRGL1  
UPP1  
IL1RN  
IL1RAP  
EDN1  
ZNF1  
CSTA  
TLR4  
SLCO4C1  
DNAJA1  
VCPIP1  
DAXX  
SOD2  
CASP4  
TCIRG1  
RSAD2  
DTX3L  
MICALL2  
CFB  
TIFA  
NUDT3

6 common

PLXND1  
C5orf23  
LYST  
RNF128  
FAM105A  
RNF144A

1 elements in "IR Vs DR Downregulated genes"

## Comparative (functional classification) of differentially expressed

IR

| Term_IR                                               | Count_IR | %_IR     | Pvalue_IR   |
|-------------------------------------------------------|----------|----------|-------------|
| GO:0045087~innate immune response*                    | 13       | 11.40351 | 4.39622E-06 |
| GO:0006955~immune response*                           | 16       | 14.03509 | 0.000141159 |
| GO:0051049~regulation of transport*                   | 18       | 15.78947 | 0.00027454  |
| GO:0031349~positive regulation of defense             | 7        | 6.140351 | 0.000763953 |
| GO:0080134~regulation of response to stress           | 13       | 11.40351 | 0.002728222 |
| GO:0051046~regulation of secretion*                   | 9        | 7.894737 | 0.004426807 |
| GO:0006952~defense response*                          | 14       | 12.2807  | 0.004816061 |
| GO:1903321~negative regulation of protein             | 4        | 3.508772 | 0.005162758 |
| GO:0048584~positive regulation of response            | 16       | 14.03509 | 0.007398484 |
| GO:0031396~regulation of protein ubiquitination       | 5        | 4.385965 | 0.009117438 |
| GO:0009967~positive regulation of signal transduction | 13       | 11.40351 | 0.009413673 |
| GO:0002252~immune effector process*                   | 9        | 7.894737 | 0.009951344 |
| GO:0002684~positive regulation of immune response     | 9        | 7.894737 | 0.013011642 |
| GO:0010647~positive regulation of cell communication  | 13       | 11.40351 | 0.016000491 |
| GO:0023056~positive regulation of signaling           | 13       | 11.40351 | 0.016713717 |
| GO:0070647~protein modification by small molecule     | 9        | 7.894737 | 0.020895675 |
| GO:0001817~regulation of cytokine production          | 7        | 6.140351 | 0.023481971 |
| GO:0050776~regulation of immune response              | 7        | 6.140351 | 0.030043982 |
| GO:0001816~cytokine production*                       | 7        | 6.140351 | 0.032475304 |
| GO:1903530~regulation of secretion by cell            | 7        | 6.140351 | 0.032892685 |
| GO:0045089~positive regulation of innate immunity     | 4        | 3.508772 | 0.033236985 |
| GO:0031347~regulation of defense response             | 7        | 6.140351 | 0.033313564 |
| GO:0050778~positive regulation of immune response     | 6        | 5.263158 | 0.0357072   |
| GO:0009605~response to external stimulus              | 15       | 13.15789 | 0.036916498 |
| GO:0046903~secretion*                                 | 9        | 7.894737 | 0.038929275 |
| GO:0043506~regulation of JUN kinase activity          | 3        | 2.631579 | 0.042808283 |
| GO:0030522~intracellular receptor signaling           | 4        | 3.508772 | 0.043632142 |
| GO:1903901~negative regulation of viral life cycle    | 3        | 2.631579 | 0.049912503 |
| GO:0070887~cellular response to chemical              | 16       | 14.03509 | 0.052332138 |
| GO:0042089~cytokine biosynthetic process              | 3        | 2.631579 | 0.057408925 |
| GO:0030097~hemopoiesis*                               | 8        | 7.017544 | 0.058223077 |
| GO:0042107~cytokine metabolic process*                | 3        | 2.631579 | 0.059340994 |
| GO:0080135~regulation of cellular response            | 6        | 5.263158 | 0.059836741 |
| GO:0045088~regulation of innate immunity              | 4        | 3.508772 | 0.060103613 |
| GO:0051223~regulation of protein transport            | 7        | 6.140351 | 0.063953798 |
| GO:0048525~negative regulation of viral protein       | 3        | 2.631579 | 0.065269473 |
| GO:0009966~regulation of signal transduction          | 17       | 14.91228 | 0.065357997 |
| GO:0060429~epithelium development*                    | 9        | 7.894737 | 0.073942418 |
| GO:0048534~hematopoietic or lymphoid organ            | 8        | 7.017544 | 0.076787997 |
| GO:1902533~positive regulation of intracellular       | 8        | 7.017544 | 0.078689887 |
| GO:0030518~intracellular steroid hormone              | 3        | 2.631579 | 0.079821647 |
| GO:0002221~pattern recognition receptor               | 3        | 2.631579 | 0.08415012  |
| GO:0002758~innate immune response-activation          | 3        | 2.631579 | 0.088548912 |
| GO:0070201~regulation of establishment of             | 7        | 6.140351 | 0.090098046 |
| GO:0019058~viral life cycle*                          | 4        | 3.508772 | 0.091552217 |
| GO:0002520~immune system development                  | 8        | 7.017544 | 0.094189229 |

GO:0002218~activation of innate immune r3

2.631579 0.097545876



|                                            |    |          |             |
|--------------------------------------------|----|----------|-------------|
| GO:0051050~positive regulation of transpo  | 11 | 9.649123 | 0.002152699 |
| GO:0051047~positive regulation of secretic | 6  | 5.263158 | 0.009544619 |
| GO:0002449~lymphocyte mediated immun       | 5  | 4.385965 | 0.010283401 |
| GO:0022008~neurogenesis                    | 13 | 11.40351 | 0.012543346 |
| GO:0070488~neutrophil aggregation          | 2  | 1.754386 | 0.014593084 |
| GO:0002706~regulation of lymphocyte mei    | 4  | 3.508772 | 0.015131827 |
| GO:0009628~response to abiotic stimulus    | 9  | 7.894737 | 0.01592055  |
| GO:0036211~protein modification process    | 23 | 20.17544 | 0.019616836 |
| GO:0006464~cellular protein modification   | 23 | 20.17544 | 0.019616836 |
| GO:0040011~locomotion                      | 13 | 11.40351 | 0.019647203 |
| GO:0007585~respiratory gaseous exchange    | 3  | 2.631579 | 0.020178415 |
| GO:0090108~positive regulation of high-de  | 1  | 1.754386 | 0.021810551 |
| GO:0002443~leukocyte mediated immunity     | 5  | 4.385965 | 0.025224327 |
| GO:0071705~nitrogen compound transport     | 7  | 6.140351 | 0.028874783 |
| GO:0090107~regulation of high-density lipi | 1  | 1.754386 | 0.028975802 |
| GO:0002793~positive regulation of peptide  | 3  | 2.631579 | 0.02989537  |
| GO:0051240~positive regulation of multice  | 12 | 10.52632 | 0.030377294 |
| GO:0002703~regulation of leukocyte medi    | 4  | 3.508772 | 0.030656924 |
| GO:0034599~cellular response to oxidative  | 4  | 3.508772 | 0.035927034 |

|                                             |    |          |             |
|---------------------------------------------|----|----------|-------------|
| GO:0002523~leukocyte migration involved     | 2  | 1.754386 | 0.03608921  |
| GO:0009408~response to heat                 | 3  | 2.631579 | 0.036125655 |
| GO:0031397~negative regulation of protei    | 3  | 2.631579 | 0.03775513  |
| GO:0046903~secretion*                       | 9  | 7.894737 | 0.038929275 |
| GO:0008361~regulation of cell size          | 4  | 3.508772 | 0.040652784 |
| GO:0006979~response to oxidative stress     | 5  | 4.385965 | 0.040735357 |
| GO:0048699~generation of neurons            | 11 | 9.649123 | 0.040789213 |
| GO:0048870~cell motility                    | 11 | 9.649123 | 0.041432083 |
| GO:0051674~localization of cell             | 11 | 9.649123 | 0.041432083 |
| GO:0001909~leukocyte mediated cytotoxic     | 3  | 2.631579 | 0.042808283 |
| GO:0032725~positive regulation of granulo   | 2  | 1.754386 | 0.043151147 |
| GO:0021782~glial cell development           | 3  | 2.631579 | 0.044545985 |
| GO:0002790~peptide secretion                | 4  | 3.508772 | 0.047770316 |
| GO:0002708~positive regulation of lympho    | 3  | 2.631579 | 0.048098554 |
| GO:0043588~skin development                 | 4  | 3.508772 | 0.050996667 |
| GO:0070486~leukocyte aggregation            | 6  | 5.263158 | 0.052274372 |
| GO:0010942~positive regulation of cell dea  | 6  | 5.263158 | 0.056325222 |
| GO:0015833~peptide transport                | 4  | 3.508772 | 0.056603771 |
| GO:0033554~cellular response to stress      | 13 | 11.40351 | 0.056853797 |
| GO:0018119~peptidyl-cysteine S-nitrosylat   | 2  | 1.754386 | 0.057122074 |
| GO:0017014~protein nitrosylation            | 2  | 1.754386 | 0.057122074 |
| GO:0032604~granulocyte macrophage colc      | 2  | 1.754386 | 0.057122074 |
| GO:0032645~regulation of granulocyte ma     | 2  | 1.754386 | 0.057122074 |
| GO:0007399~nervous system development       | 14 | 12.2807  | 0.057777374 |
| GO:0006885~regulation of pH                 | 3  | 2.631579 | 0.061295388 |
| GO:0001819~positive regulation of cytokin   | 5  | 4.385965 | 0.061540302 |
| GO:0030217~T cell differentiation           | 4  | 3.508772 | 0.062492394 |
| GO:0032368~regulation of lipid transport    | 3  | 2.631579 | 0.063271687 |
| GO:0002705~positive regulation of leukocy   | 3  | 2.631579 | 0.063271687 |
| GO:0050729~positive regulation of inflamn   | 3  | 2.631579 | 0.065269473 |
| GO:0042886~amide transport                  | 4  | 3.508772 | 0.066157708 |
| GO:0009314~response to radiation            | 5  | 4.385965 | 0.067012275 |
| GO:0042752~regulation of circadian rhythr   | 3  | 2.631579 | 0.067288336 |
| GO:0034380~high-density lipoprotein parti   | 2  | 1.754386 | 0.070891494 |
| GO:0001906~cell killing                     | 3  | 2.631579 | 0.071387666 |
| GO:0007159~leukocyte cell-cell adhesion     | 6  | 5.263158 | 0.071901283 |
| GO:0008544~epidermis development            | 4  | 3.508772 | 0.07248147  |
| GO:0002697~regulation of immune effecto     | 5  | 4.385965 | 0.073707289 |
| GO:0060429~epithelium development*          | 9  | 7.894737 | 0.073942418 |
| GO:0030098~lymphocyte differentiation       | 5  | 4.385965 | 0.074690758 |
| GO:0009266~response to temperature stin     | 3  | 2.631579 | 0.075566478 |
| GO:0010875~positive regulation of cholest   | 2  | 1.754386 | 0.077701537 |
| GO:0009416~response to light stimulus       | 4  | 3.508772 | 0.084517728 |
| GO:0006928~movement of cell or subcellul    | 12 | 10.52632 | 0.084693947 |
| GO:0065003~macromolecular complex assi      | 11 | 9.649123 | 0.085095593 |
| GO:0043153~entrainment of circadian cloc    | 2  | 1.754386 | 0.091174066 |
| GO:0032376~positive regulation of cholest   | 2  | 1.754386 | 0.091174066 |
| GO:0032373~positive regulation of sterol ti | 2  | 1.754386 | 0.091174066 |
| GO:0009648~photoperiodism                   | 2  | 1.754386 | 0.091174066 |
| GO:0006869~lipid transport                  | 4  | 3.508772 | 0.091552217 |

|                                            |   |          |             |
|--------------------------------------------|---|----------|-------------|
| GO:0006935~chemotaxis                      | 6 | 5.263158 | 0.092330835 |
| GO:0045321~leukocyte activation            | 7 | 6.140351 | 0.092442995 |
| GO:0042330~taxis                           | 6 | 5.263158 | 0.093241595 |
| GO:0055067~monovalent inorganic cation     | 3 | 2.631579 | 0.097545876 |
| GO:0010874~regulation of cholesterol efflu | 2 | 1.754386 | 0.097837254 |
| GO:0030194~positive regulation of blood c  | 2 | 1.754386 | 0.097837254 |
| GO:1900048~positive regulation of hemost   | 2 | 1.754386 | 0.097837254 |
| GO:0010837~regulation of keratinocyte pr   | 2 | 1.754386 | 0.097837254 |
| GO:0050820~positive regulation of coagula  | 2 | 1.754386 | 0.097837254 |
| GO:0032101~regulation of response to ext   | 7 | 6.140351 | 0.0996771   |

## Downregulated genes (DEGs) involved in the biological process (BP) of IR

| Genes_IR                                  | Term_DR                                               |
|-------------------------------------------|-------------------------------------------------------|
| S100A8, CFB, S100A9, SYNCRIP, RSAD2, TLR4 | GO:0045087~innate immune response*                    |
| FCER1A, GPR183, S100A8, CFB, S100A9, SYN  | GO:0006955~immune response*                           |
| MICALL2, FCER1A, ACAA2, S100A8, S100A9,   | GO:0051049~regulation of transport*                   |
| DDX58, FCER1A, SH2D1A, S100A8, S100A9, F  | GO:0031349~positive regulation of defense response    |
| DDX58, FCER1A, SH2D1A, S100A8, GPR37, H   | GO:0080134~regulation of response to stress*          |
| FCER1A, S100A8, EDN1, S100A9, IL1RAP, SO  | GO:0051046~regulation of secretion*                   |
| FCER1A, S100A8, CFB, S100A9, SYNCRIP, RS  | GO:0006952~defense response*                          |
| DNAJA1, SOX4, CRY1, TRIM21                | GO:1903321~negative regulation of protein modifica    |
| FCER1A, GPR183, S100A8, CFB, S100A9, EDN  | GO:0048584~positive regulation of response to stimu   |
| CDC14B, DNAJA1, SOX4, CRY1, DAXX          | GO:0031396~regulation of protein ubiquitination*      |
| FCER1A, GPR183, ACVR1B, SH2D1A, S100A8    | GO:0009967~positive regulation of signal transductio  |
| DDX58, FCER1A, GPR183, SH2D1A, CFB, LYS1  | GO:0002252~immune effector process*                   |
| DDX58, FCER1A, GPR183, ACVR1B, SH2D1A,    | GO:0002684~positive regulation of immune system p     |
| FCER1A, GPR183, ACVR1B, SH2D1A, S100A8    | GO:0010647~positive regulation of cell communicati    |
| FCER1A, GPR183, ACVR1B, SH2D1A, S100A8    | GO:0023056~positive regulation of signaling*          |
| USP18, CDC14B, DTX3L, USP1, DNAJA1, SOX   | GO:0070647~protein modification by small protein c    |
| DDX58, FCER1A, HPSE, IL1RAP, RNF128, RSA  | GO:0001817~regulation of cytokine production*         |
| DDX58, FCER1A, SH2D1A, CFB, RSAD2, TLR4,  | GO:0050776~regulation of immune response*             |
| DDX58, FCER1A, HPSE, IL1RAP, RNF128, RSA  | GO:0001816~cytokine production*                       |
| FCER1A, EDN1, IL1RAP, SOX4, RSAD2, TLR4,  | GO:1903530~regulation of secretion by cell*           |
| DDX58, SH2D1A, RSAD2, TLR4                | GO:0045089~positive regulation of innate immune re    |
| DDX58, FCER1A, SH2D1A, S100A8, S100A9, F  | GO:0031347~regulation of defense response*            |
| DDX58, FCER1A, SH2D1A, CFB, RSAD2, TLR4   | GO:0050778~positive regulation of immune response     |
| FCER1A, GPR183, S100A8, S100A9, RSAD2, T  | GO:0009605~response to external stimulus*             |
| FCER1A, S100A8, EDN1, S100A9, IL1RAP, SO  | GO:0046903~secretion*                                 |
| FCER1A, EDN1, DNAJA1                      | GO:0043506~regulation of JUN kinase activity*         |
| DDX58, DNAJA1, CRY1, DAXX                 | GO:0030522~intracellular receptor signaling pathway   |
| RSAD2, TRIM21, ISG20                      | GO:1903901~negative regulation of viral life cycle*   |
| ACAA2, GPR183, S100A8, IL1RN, S100A9, SY  | GO:0070887~cellular response to chemical stimulus*    |
| FCER1A, IL1RAP, RNF128                    | GO:0042089~cytokine biosynthetic process*             |
| GPR183, ACVR1B, AGPAT5, BCL11B, SOX4, R   | GO:0030097~hemopoiesis*                               |
| FCER1A, IL1RAP, RNF128                    | GO:0042107~cytokine metabolic process*                |
| FCER1A, GPR37, USP1, EDN1, DNAJA1, CRY1   | GO:0080135~regulation of cellular response to stress  |
| DDX58, SH2D1A, RSAD2, TLR4                | GO:0045088~regulation of innate immune response*      |
| DDX58, MICALL2, IL1RAP, DNAJA1, SOX4, RS  | GO:0051223~regulation of protein transport*           |
| RSAD2, TRIM21, ISG20                      | GO:0048525~negative regulation of viral process*      |
| FCER1A, ACAA2, GPR183, S100A8, S100A9, I  | GO:0009966~regulation of signal transduction*         |
| MIB1, ACVR1B, HPSE, BCL11B, ARG2, EDN1,   | GO:0060429~epithelium development*                    |
| GPR183, ACVR1B, AGPAT5, BCL11B, SOX4, R   | GO:0048534~hematopoietic or lymphoid organ devel      |
| FCER1A, GPR183, S100A8, GPR37, HPSE, EDN  | GO:1902533~positive regulation of intracellular signa |
| DNAJA1, CRY1, DAXX                        | GO:0030518~intracellular steroid hormone receptor     |
| DDX58, RSAD2, TLR4                        | GO:0002221~pattern recognition receptor signaling p   |
| DDX58, RSAD2, TLR4                        | GO:0002758~innate immune response-activating sign     |
| DDX58, MICALL2, IL1RAP, DNAJA1, SOX4, RS  | GO:0070201~regulation of establishment of protein I   |
| RSAD2, SSB, TRIM21, ISG20                 | GO:0019058~viral life cycle*                          |
| GPR183, ACVR1B, AGPAT5, BCL11B, SOX4, R   | GO:0002520~immune system development*                 |

DDX58, RSAD2, TLR4

GO:0002218~activation of innate immune response\*  
GO:0034097~response to cytokine  
GO:1903900~regulation of viral life cycle  
GO:0045071~negative regulation of viral genome replication  
GO:0050792~regulation of viral process  
GO:0043901~negative regulation of multi-organism process  
GO:0016032~viral process  
GO:0051607~defense response to virus  
GO:0043903~regulation of symbiosis, encompassing mutualism  
GO:0044764~multi-organism cellular process  
GO:0098542~defense response to other organism  
GO:0044419~interspecies interaction between organisms  
GO:0044403~symbiosis, encompassing mutualism through commensalism  
GO:0043900~regulation of multi-organism process  
GO:0045069~regulation of viral genome replication  
GO:0009615~response to virus  
GO:0019079~viral genome replication  
GO:0010033~response to organic substance  
GO:0002682~regulation of immune system process  
GO:0034340~response to type I interferon  
GO:0071345~cellular response to cytokine stimulus  
GO:0032439~endosome localization  
GO:0034341~response to interferon-gamma  
GO:0051707~response to other organism  
GO:0043207~response to external biotic stimulus  
GO:0009607~response to biotic stimulus  
GO:0044093~positive regulation of molecular function  
GO:0065009~regulation of molecular function  
GO:1903320~regulation of protein modification by serine phosphorylation  
GO:0035455~response to interferon-alpha  
GO:0032647~regulation of interferon-alpha production  
GO:0032607~interferon-alpha production  
GO:0007254~JNK cascade  
GO:0046328~regulation of JNK cascade  
GO:0048147~negative regulation of fibroblast proliferation  
GO:0060759~regulation of response to cytokine stimulus  
GO:0046596~regulation of viral entry into host cell  
GO:0071357~cellular response to type I interferon  
GO:0002253~activation of immune response  
GO:0019221~cytokine-mediated signaling pathway  
GO:0008285~negative regulation of cell proliferation  
GO:0032872~regulation of stress-activated MAPK cascade  
GO:0070302~regulation of stress-activated protein kinase activity  
GO:0051403~stress-activated MAPK cascade  
GO:0045428~regulation of nitric oxide biosynthetic process  
GO:0031098~stress-activated protein kinase signaling pathway  
GO:0071310~cellular response to organic substance  
GO:0002758~innate immune response-activating signaling pathway  
GO:0032648~regulation of interferon-beta production  
GO:0032608~interferon-beta production

GO:0046330~positive regulation of JNK cascade  
GO:1903426~regulation of reactive oxygen species bi  
GO:0002757~immune response-activating signal tran  
GO:0002764~immune response-regulating signaling p  
GO:0051828~entry into other organism involved in sy  
GO:0044409~entry into host  
GO:0030260~entry into host cell  
GO:0046718~viral entry into host cell  
GO:0051806~entry into cell of other organism involv  
GO:0032874~positive regulation of stress-activated N  
GO:0070304~positive regulation of stress-activated p  
GO:0032479~regulation of type I interferon producti  
GO:0032606~type I interferon production  
GO:0050707~regulation of cytokine secretion  
GO:0071346~cellular response to interferon-gamma  
GO:0044089~positive regulation of cellular compone  
GO:1903409~reactive oxygen species biosynthetic pr  
GO:0006915~apoptotic process  
GO:0046598~positive regulation of viral entry into hc  
GO:0008219~cell death  
GO:0016567~protein ubiquitination  
GO:0009117~nucleotide metabolic process  
GO:0042976~activation of Janus kinase activity  
GO:0044248~cellular catabolic process  
GO:0032940~secretion by cell  
GO:0006753~nucleoside phosphate metabolic proces  
GO:0048145~regulation of fibroblast proliferation  
GO:0001959~regulation of cytokine-mediated signali  
GO:0048144~fibroblast proliferation  
GO:0090501~RNA phosphodiester bond hydrolysis  
GO:0035457~cellular response to interferon-alpha  
GO:1903321~negative regulation of protein modifica  
GO:0050790~regulation of catalytic activity  
GO:0050708~regulation of protein secretion  
GO:0032446~protein modification by small protein c  
GO:0051701~interaction with host  
GO:0008283~cell proliferation  
GO:0042127~regulation of cell proliferation  
GO:0012501~programmed cell death  
GO:0060333~interferon-gamma-mediated signaling p  
GO:0051246~regulation of protein metabolic process  
GO:0002224~toll-like receptor signaling pathway  
GO:0055086~nucleobase-containing small molecule r  
GO:0051090~regulation of sequence-specific DNA bin  
GO:0045351~type I interferon biosynthetic process  
GO:0060330~regulation of response to interferon-ga  
GO:0032880~regulation of protein localization  
GO:0051091~positive regulation of sequence-specific  
GO:0051130~positive regulation of cellular compone  
GO:0032727~positive regulation of interferon-alpha p

GO:1902187~negative regulation of viral release from  
GO:0031399~regulation of protein modification proc  
GO:0031647~regulation of protein stability  
GO:0071396~cellular response to lipid  
GO:0007166~cell surface receptor signaling pathway  
GO:0006796~phosphate-containing compound meta  
GO:0046777~protein autophosphorylation  
GO:0001525~angiogenesis  
GO:0043085~positive regulation of catalytic activity  
GO:0006793~phosphorus metabolic process  
GO:0051248~negative regulation of protein metaboli  
GO:0009306~protein secretion  
GO:0042036~negative regulation of cytokine biosynt  
GO:0060337~type I interferon signaling pathway  
GO:0002313~mature B cell differentiation involved in  
GO:0006164~purine nucleotide biosynthetic process  
GO:0009893~positive regulation of metabolic proces  
GO:0071229~cellular response to acid chemical  
GO:0032270~positive regulation of cellular protein m  
GO:0014070~response to organic cyclic compound  
GO:0007249~I-kappaB kinase/NF-kappaB signaling  
GO:0034655~nucleobase-containing compound catal  
GO:0044265~cellular macromolecule catabolic proce  
GO:0031325~positive regulation of cellular metabolic  
GO:0072522~purine-containing compound biosynthe  
GO:0045429~positive regulation of nitric oxide biosyn  
GO:1904407~positive regulation of nitric oxide metal  
GO:0002335~mature B cell differentiation  
GO:0071356~cellular response to tumor necrosis fact  
GO:0034654~nucleobase-containing compound biosy  
GO:2000377~regulation of reactive oxygen species m

DDX58, FCER1A, MICALL2, MIB1, S100A8, EDN1, S100A9, IL1RAP, SOX4, PLTP

FCER1A, S100A8, EDN1, S100A9, IL1RAP, SOX4

FCER1A, SH2D1A, LYST, RSAD2, IL7R

MICALL2, S100A8, S100A9, SOX4, SOD2, MIB1, MAN2A1, SEMA6D, BCL11B, IL1RAP, PBX3, PLXND1  
S100A8, S100A9

FCER1A, SH2D1A, RSAD2, IL7R

ACAA2, USP1, EDN1, PSIP1, DNAJA1, PPP1CC, CRY1, SOD2, TP53INP1

FCER1A, GPR183, GALNT7, S100A8, CDC14B, USP1, DTX3L, S100A9, EDN1, SOX4, DAXX, TRIM21, N

FCER1A, GPR183, GALNT7, S100A8, CDC14B, USP1, DTX3L, S100A9, EDN1, SOX4, DAXX, TRIM21, N

DDX58, GPR183, ACVR1B, S100A8, SEMA6D, GPR37, BCL11B, S100A9, EDN1, DNAJA1, TNK2, PLXN  
MAN2A1, EDN1, PBX3

PLTP

FCER1A, SH2D1A, LYST, RSAD2, IL7R

FCER1A, S100A8, EDN1, S100A9, SOX4, SLC38A1, TCN1

PLTP

S100A8, S100A9, SOX4

DDX58, FCER1A, MAN2A1, ACVR1B, HPSE, EDN1, S100A9, IL1RAP, RSAD2, IL7R, PLTP

FCER1A, SH2D1A, RSAD2, IL7R

GPR37, SLC25A24, SOD2, TP53INP1

S100A8, S100A9  
PSIP1, DNAJA1, TP53INP1  
DNAJA1, SOX4, CRY1  
FCER1A, S100A8, EDN1, S100A9, IL1RAP, SOX4, RSAD2, TLR4, CRY1  
SEMA6D, EDN1, PLXND1, IL7R  
GPR37, SLC25A24, PSIP1, SOD2, TP53INP1  
MICALL2, MIB1, MAN2A1, SEMA6D, BCL11B, IL1RAP, SOX4, PLXND1, PBX3, ACSL6, SOD2  
DDX58, GPR183, ACVR1B, SEMA6D, S100A8, EDN1, S100A9, DNAJA1, TNK2, PLXND1, TP53INP1  
DDX58, GPR183, ACVR1B, SEMA6D, S100A8, EDN1, S100A9, DNAJA1, TNK2, PLXND1, TP53INP1  
SH2D1A, LYST, IL7R  
DDX58, FCER1A  
S100A8, S100A9, SOX4  
S100A8, EDN1, S100A9, SOX4  
FCER1A, SH2D1A, RSAD2  
ACVR1B, HPSE, BCL11B, TGM1  
S100A8, BCL11B, S100A9, SOX4, RSAD2, IL7R  
S100A8, S100A9, DNAJA1, SOX4, DAXX, TP53INP1  
S100A8, EDN1, S100A9, SOX4  
FCER1A, ACAA2, CDC14B, USP1, DTX3L, EDN1, SOX4, SOD2, GPR37, SLC25A24, DNAJA1, CRY1, TP5  
S100A8, S100A9  
S100A8, S100A9  
DDX58, FCER1A  
DDX58, FCER1A  
MICALL2, S100A8, S100A9, SOX4, SOD2, MBP, MAN2A1, MIB1, SEMA6D, BCL11B, IL1RAP, PLXND1  
TCIRG1, EDN1, SLC4A4  
DDX58, FCER1A, HPSE, IL1RAP, RSAD2  
BCL11B, SOX4, RSAD2, IL7R  
CRY1, PLTP  
FCER1A, SH2D1A, RSAD2  
FCER1A, S100A8, S100A9  
S100A8, EDN1, S100A9, SOX4  
USP1, PPP1CC, CRY1, SOD2, TP53INP1  
PSPC1, PPP1CC, CRY1  
PLTP  
SH2D1A, LYST, IL7R  
S100A8, BCL11B, S100A9, SOX4, RSAD2, IL7R  
ACVR1B, HPSE, BCL11B, TGM1  
DDX58, FCER1A, SH2D1A, RSAD2, IL7R  
MIB1, ACVR1B, HPSE, BCL11B, ARG2, EDN1, TGM1, SOX4, PLXND1  
GPR183, BCL11B, SOX4, RSAD2, IL7R  
PSIP1, DNAJA1, TP53INP1  
PLTP  
USP1, PPP1CC, CRY1, TP53INP1  
DDX58, GPR183, ACVR1B, SEMA6D, S100A8, BCL11B, EDN1, S100A9, DNAJA1, TNK2, PLXND1, TP5:  
MICALL2, TCIRG1, PSIP1, NAP1L1, TLR4, DAXX, PLTP, TRIM21, CENPH, KCTD12  
PPP1CC, CRY1  
PLTP  
PLTP  
PPP1CC, CRY1  
OSBPL8, CRY1, PLTP

GPR183, SEMA6D, S100A8, BCL11B, S100A9, PLXND1  
FCER1A, GPR183, BCL11B, SOX4, RSAD2, TLR4, IL7R  
GPR183, SEMA6D, S100A8, BCL11B, S100A9, PLXND1  
TCIRG1, EDN1, SLC4A4  
PLTP  
HPSE, S100A9  
HPSE, S100A9  
BCL11B, TGM1  
HPSE, S100A9  
DDX58, FCER1A, SEMA6D, S100A8, HPSE, S100A9, PLXND1

**and DR pigs. Asterisks indicate terms commonly enriched in the IR ar  
DR**

| Count_DR | %_DR     | Pvalue_DR   | Genes_DR                                                 |
|----------|----------|-------------|----------------------------------------------------------|
| 22       | 21.35922 | 2.22103E-15 | NMI, CFB, SOCS1, CCL8, TRIM26, RSAD2, OAS1, TLR4, STA    |
| 24       | 23.30097 | 9.22468E-11 | NMI, CFB, LGALS1, SOCS1, CCL8, RSAD2, TRIM26, OAS1, T    |
| 14       | 13.59223 | 0.007946251 | MICALL2, SOCS1, EDN1, RSAD2, TLR4, ANXA4, DDX58, PTK     |
| 6        | 5.825243 | 0.003358149 | DDX58, PLSCR1, IRF7, CCL8, RSAD2, TLR4                   |
| 17       | 16.50485 | 6.0055E-06  | NMI, SOCS1, EDN1, CCL8, RSAD2, TLR4, STK3, DDX58, PLS    |
| 7        | 6.796117 | 0.033431946 | EDN1, SOCS1, IL1RAP, RSAD2, SYTL2, TLR4, ANXA4           |
| 25       | 24.27184 | 1.90717E-10 | NMI, CFB, SOCS1, RSAD2, TRIM26, CCL8, LGALS8, TLR4, O    |
| 3        | 2.912621 | 0.041872294 | ISG15, DNAJA1, TRIM21                                    |
| 16       | 15.53398 | 0.003506926 | CFB, LGALS1, SOCS1, EDN1, CCL8, RSAD2, TLR4, STK3, DD    |
| 5        | 4.854369 | 0.006975041 | NMI, ISG15, PTK2B, DNAJA1, DAXX                          |
| 11       | 10.67961 | 0.033050343 | ACVR1B, TNFSF10, PTK2B, LGALS1, IRF7, EDN1, SOCS1, CC    |
| 15       | 14.56311 | 5.11276E-07 | CFB, LGALS1, RSAD2, OAS1, ISG20, IFIT3, DDX58, PLSCR1,   |
| 11       | 10.67961 | 0.000601118 | DDX58, PLSCR1, ACVR1B, ISG15, PTK2B, CFB, LGALS1, IRF7   |
| 11       | 10.67961 | 0.049992376 | ACVR1B, TNFSF10, PTK2B, LGALS1, IRF7, EDN1, SOCS1, CC    |
| 11       | 10.67961 | 0.051716033 | ACVR1B, TNFSF10, PTK2B, LGALS1, IRF7, EDN1, SOCS1, CC    |
| 10       | 9.708738 | 0.004228912 | USP18, NMI, ISG15, PTK2B, DTX3L, SOCS1, DNAJA1, USP2     |
| 10       | 9.708738 | 0.000198086 | DDX58, NMI, ISG15, IRF7, SOCS1, IL1RAP, RNF128, RSAD2    |
| 11       | 10.67961 | 5.72783E-05 | DDX58, PLSCR1, NMI, PARP9, CFB, IRF7, SOCS1, RSAD2, TL   |
| 10       | 9.708738 | 0.000348481 | DDX58, NMI, ISG15, IRF7, SOCS1, IL1RAP, RNF128, RSAD2    |
| 7        | 6.140351 | 0.032892685 | FCER1A, EDN1, IL1RAP, SOX4, RSAD2, TLR4, CRY1            |
| 5        | 4.854369 | 0.004045983 | DDX58, PLSCR1, IRF7, RSAD2, TLR4                         |
| 10       | 9.708738 | 0.000364419 | DDX58, PLSCR1, NMI, PARP9, IRF7, SOCS1, CCL8, RSAD2, T   |
| 7        | 6.796117 | 0.006755701 | DDX58, PLSCR1, CFB, IRF7, RSAD2, TLR4, TEC               |
| 17       | 16.50485 | 0.003644783 | CCL8, LGALS8, RSAD2, OAS1, TLR4, STAT1, ISG20, IFIT3, DI |
| 8        | 7.76699  | 0.066158434 | EDN1, SOCS1, IL1RAP, CCL8, RSAD2, SYTL2, TLR4, ANXA4     |
| 3        | 2.912621 | 0.037228252 | EDN1, DNAJA1, PAK1                                       |
| 4        | 3.883495 | 0.035980383 | DDX58, DNAJA1, PAK1, DAXX                                |
| 8        | 7.76699  | 3.38829E-08 | PLSCR1, ISG15, TRIM26, RSAD2, OAS1, MX1, TRIM21, ISG2    |
| 16       | 15.53398 | 0.028589243 | NMI, SOCS1, IL1RN, CCL8, TLR4, UBR1, STAT1, DAXX, SOD    |
| 4        | 3.883495 | 0.005500896 | NMI, IRF7, IL1RAP, RNF128                                |
| 8        | 7.76699  | 0.041189856 | ACVR1B, ISG15, PTK2B, LGALS1, RSAD2, ETV6, STK3, SOD2    |
| 4        | 3.883495 | 0.005796414 | NMI, IRF7, IL1RAP, RNF128                                |
| 6        | 5.825243 | 0.045588409 | PTK2B, EDN1, DNAJA1, PAK1, USP25, STK3                   |
| 9        | 8.737864 | 1.58246E-06 | DDX58, PLSCR1, NMI, PARP9, IRF7, SOCS1, RSAD2, TLR4, T   |
| 8        | 7.76699  | 0.015669133 | DDX58, MICALL2, SOCS1, IL1RAP, DNAJA1, RSAD2, TLR4, A    |
| 8        | 7.76699  | 9.98799E-08 | PLSCR1, ISG15, TRIM26, RSAD2, OAS1, MX1, TRIM21, ISG2    |
| 16       | 15.53398 | 0.066522147 | LGALS1, SOCS1, EDN1, IL1RN, CCL8, RSAD2, UBR1, STAT1,    |
| 9        | 8.737864 | 0.05124364  | ACVR1B, TDRD7, EDN1, TGM1, PAK1, PLXND1, STAT1, AN       |
| 8        | 7.76699  | 0.05507698  | ACVR1B, ISG15, PTK2B, LGALS1, RSAD2, ETV6, STK3, SOD2    |
| 8        | 7.76699  | 0.056513571 | TNFSF10, PTK2B, LGALS1, EDN1, SOCS1, CCL8, PAK1, STK3    |
| 3        | 2.912621 | 0.069869332 | DNAJA1, PAK1, DAXX                                       |
| 4        | 3.883495 | 0.010092501 | DDX58, IRF7, RSAD2, TLR4                                 |
| 4        | 3.883495 | 0.010947379 | DDX58, IRF7, RSAD2, TLR4                                 |
| 8        | 7.76699  | 0.024493064 | DDX58, MICALL2, SOCS1, IL1RAP, DNAJA1, RSAD2, TLR4, A    |
| 9        | 8.737864 | 6.08039E-06 | PLSCR1, ISG15, LGALS1, TRIM26, RSAD2, OAS1, MX1, TRIM    |
| 8        | 7.76699  | 0.068309908 | ACVR1B, ISG15, PTK2B, LGALS1, RSAD2, ETV6, STK3, SOD2    |

|    |          |             |                                                           |
|----|----------|-------------|-----------------------------------------------------------|
| 4  | 3.883495 | 0.012779698 | DDX58, IRF7, RSAD2, TLR4                                  |
| 15 | 14.56311 | 1.11316E-07 | NMI, IL1RN, SOCS1, CCL8, STAT1, TRIM21, IFIT3, IFIT2, PAI |
| 9  | 8.737864 | 1.79919E-07 | PLSCR1, ISG15, LGALS1, TRIM26, RSAD2, OAS1, MX1, TRIM     |
| 6  | 5.825243 | 8.99825E-07 | PLSCR1, ISG15, RSAD2, OAS1, MX1, ISG20                    |
| 10 | 9.708738 | 2.47103E-06 | DDX58, PLSCR1, ISG15, LGALS1, TRIM26, RSAD2, OAS1, M      |
| 8  | 7.76699  | 3.16732E-06 | PLSCR1, ISG15, TRIM26, RSAD2, OAS1, MX1, TRIM21, ISG2     |
| 13 | 12.62136 | 4.97901E-06 | IFIT3, DDX58, IFIT2, PLSCR1, ISG15, LGALS1, RSAD2, TRIM:  |
| 10 | 9.708738 | 5.09254E-06 | IFIT3, DDX58, PLSCR1, IFIT2, ISG15, RSAD2, OAS1, MX1, M   |
| 10 | 9.708738 | 5.31553E-06 | DDX58, PLSCR1, ISG15, LGALS1, TRIM26, RSAD2, OAS1, M      |
| 13 | 12.62136 | 5.41939E-06 | IFIT3, DDX58, IFIT2, PLSCR1, ISG15, LGALS1, RSAD2, TRIM:  |
| 12 | 11.65049 | 7.38519E-06 | IFIT3, DDX58, PLSCR1, IFIT2, ISG15, LGALS8, RSAD2, TLR4,  |
| 13 | 12.62136 | 9.84163E-06 | IFIT3, DDX58, IFIT2, PLSCR1, ISG15, LGALS1, RSAD2, TRIM:  |
| 13 | 12.62136 | 9.84163E-06 | IFIT3, DDX58, IFIT2, PLSCR1, ISG15, LGALS1, RSAD2, TRIM:  |
| 11 | 10.67961 | 1.03519E-05 | DDX58, PLSCR1, ACVR1B, ISG15, LGALS1, TRIM26, RSAD2,      |
| 6  | 5.825243 | 1.1066E-05  | PLSCR1, ISG15, RSAD2, OAS1, MX1, ISG20                    |
| 10 | 9.708738 | 2.28775E-05 | IFIT3, DDX58, PLSCR1, IFIT2, ISG15, RSAD2, OAS1, MX1, M   |
| 6  | 5.825243 | 2.30686E-05 | PLSCR1, ISG15, RSAD2, OAS1, MX1, ISG20                    |
| 23 | 22.3301  | 3.78705E-05 | NMI, SOCS1, IL1RN, CCL8, TLR4, UBR1, STAT1, DAXX, TRIM    |
| 15 | 14.56311 | 0.000132994 | NMI, CFB, LGALS1, SOCS1, RSAD2, TLR4, DDX58, PLSCR1, /    |
| 4  | 3.883495 | 0.000227095 | ISG15, IRF7, STAT1, MX1                                   |
| 10 | 9.708738 | 0.000264502 | IFIT3, IFIT2, NMI, PTK2B, IRF7, SOCS1, IL1RN, CCL8, STAT1 |
| 3  | 2.912621 | 0.000269814 | MX1, ANKFY1, MYO5B                                        |
| 5  | 4.854369 | 0.000327911 | NMI, SOCS1, CCL8, STAT1, TRIM21                           |
| 12 | 11.65049 | 0.000349881 | IFIT3, DDX58, PLSCR1, IFIT2, ISG15, LGALS8, RSAD2, TLR4,  |
| 12 | 11.65049 | 0.00035617  | IFIT3, DDX58, PLSCR1, IFIT2, ISG15, LGALS8, RSAD2, TLR4,  |
| 12 | 11.65049 | 0.000634745 | IFIT3, DDX58, PLSCR1, IFIT2, ISG15, LGALS8, RSAD2, TLR4,  |
| 14 | 13.59223 | 0.000739933 | EDN1, SOCS1, MED25, CCL8, TRIM26, STAT1, TRIM21, STK      |
| 19 | 18.4466  | 0.001078447 | HSP90AA1, SOCS1, EDN1, MED25, CCL8, TRIM26, STAT1, /      |
| 6  | 5.825243 | 0.001617345 | NMI, ISG15, PTK2B, DNAJA1, DAXX, TRIM21                   |
| 3  | 2.912621 | 0.001970875 | IFIT3, IFIT2, MX2                                         |
| 3  | 2.912621 | 0.002398288 | DDX58, NMI, IRF7                                          |
| 3  | 2.912621 | 0.002865336 | DDX58, NMI, IRF7                                          |
| 5  | 4.854369 | 0.003338912 | PTK2B, EDN1, DNAJA1, PAK1, STK3                           |
| 5  | 4.854369 | 0.003752056 | PTK2B, EDN1, DNAJA1, PAK1, STK3                           |
| 3  | 2.912621 | 0.003916173 | MORC3, MED25, SOD2                                        |
| 4  | 3.883495 | 0.003919678 | PARP9, IRF7, SOCS1, IL1RN                                 |
| 3  | 2.912621 | 0.004498893 | LGALS1, TRIM26, TRIM21                                    |
| 3  | 2.912621 | 0.005119109 | IRF7, STAT1, MX1                                          |
| 6  | 5.825243 | 0.005178673 | DDX58, CFB, IRF7, RSAD2, TLR4, TEC                        |
| 7  | 6.796117 | 0.006015309 | NMI, PTK2B, IRF7, SOCS1, IL1RN, CCL8, STAT1               |
| 8  | 7.76699  | 0.006362846 | IFIT3, PTK2B, MORC3, MED25, PAK1, STAT1, STK3, SOD2       |
| 5  | 4.854369 | 0.00719449  | PTK2B, EDN1, DNAJA1, PAK1, STK3                           |
| 5  | 4.854369 | 0.007418462 | PTK2B, EDN1, DNAJA1, PAK1, STK3                           |
| 5  | 4.854369 | 0.008360342 | PTK2B, EDN1, DNAJA1, PAK1, STK3                           |
| 3  | 2.912621 | 0.008764572 | HSP90AA1, PTK2B, SOD2                                     |
| 5  | 4.854369 | 0.009915176 | PTK2B, EDN1, DNAJA1, PAK1, STK3                           |
| 15 | 14.56311 | 0.010554133 | NMI, SOCS1, IL1RN, CCL8, TLR4, UBR1, STAT1, DAXX, IFIT3   |
| 4  | 3.883495 | 0.010947379 | DDX58, IRF7, RSAD2, TLR4                                  |
| 3  | 2.912621 | 0.012304059 | DDX58, NMI, IRF7                                          |
| 3  | 2.912621 | 0.012304059 | DDX58, NMI, IRF7                                          |

|    |          |             |                                                       |
|----|----------|-------------|-------------------------------------------------------|
| 4  | 3.883495 | 0.012779698 | PTK2B, EDN1, PAK1, STK3                               |
| 3  | 2.912621 | 0.013271403 | HSP90AA1, PTK2B, SOD2                                 |
| 5  | 4.854369 | 0.013563045 | DDX58, IRF7, RSAD2, TLR4, TEC                         |
| 5  | 4.854369 | 0.015304813 | DDX58, IRF7, RSAD2, TLR4, TEC                         |
| 3  | 2.912621 | 0.01745652  | LGALS1, TRIM26, TRIM21                                |
| 3  | 2.912621 | 0.01745652  | LGALS1, TRIM26, TRIM21                                |
| 3  | 2.912621 | 0.01745652  | LGALS1, TRIM26, TRIM21                                |
| 3  | 2.912621 | 0.01745652  | LGALS1, TRIM26, TRIM21                                |
| 3  | 2.912621 | 0.01745652  | LGALS1, TRIM26, TRIM21                                |
| 4  | 3.883495 | 0.017509768 | PTK2B, EDN1, PAK1, STK3                               |
| 4  | 3.883495 | 0.018087832 | PTK2B, EDN1, PAK1, STK3                               |
| 3  | 2.912621 | 0.019732102 | DDX58, NMI, IRF7                                      |
| 3  | 2.912621 | 0.022124917 | DDX58, NMI, IRF7                                      |
| 4  | 3.883495 | 0.022430694 | SOCS1, IL1RAP, TLR4, ANXA4                            |
| 3  | 2.912621 | 0.023364192 | NMI, CCL8, STAT1                                      |
| 6  | 5.825243 | 0.025184348 | PTK2B, EDN1, IL1RAP, MED25, TLR4, PAK1                |
| 3  | 2.912621 | 0.025926324 | HSP90AA1, PTK2B, SOD2                                 |
| 12 | 11.65049 | 0.026199418 | IFIT3, PLSCR1, ACVR1B, TNFSF10, PTK2B, LGALS1, DNAJA1 |
| 2  | 1.941748 | 0.026851313 | LGALS1, TRIM21                                        |
| 13 | 12.62136 | 0.030688774 | IFIT3, ACVR1B, PLSCR1, TNFSF10, PTK2B, LGALS1, DNAJA1 |
| 7  | 6.796117 | 0.031509034 | NMI, ISG15, PTK2B, DTX3L, SOCS1, DNAJA1, TRIM21       |
| 7  | 6.796117 | 0.033431946 | TCIRG1, PTK2B, HK3, EDN1, UPP1, CNP, OAS1             |
| 2  | 1.941748 | 0.033452213 | PTK2B, SOCS1                                          |
| 12 | 11.65049 | 0.034193677 | TCIRG1, USP18, ISG15, PTK2B, CNDP2, RNASET2, UPP1, AS |
| 8  | 7.76699  | 0.034852493 | EDN1, SOCS1, IL1RAP, CCL8, RSAD2, SYTL2, TLR4, ANXA4  |
| 7  | 6.796117 | 0.035430112 | TCIRG1, PTK2B, HK3, EDN1, UPP1, CNP, OAS1             |
| 3  | 2.912621 | 0.035727598 | MORC3, MED25, SOD2                                    |
| 3  | 2.912621 | 0.037228252 | IRF7, SOCS1, IL1RN                                    |
| 3  | 2.912621 | 0.037228252 | MORC3, MED25, SOD2                                    |
| 3  | 2.912621 | 0.038752842 | RNASE4, RNASET2, ISG20                                |
| 2  | 1.941748 | 0.040008932 | IFIT3, IFIT2                                          |
| 3  | 2.912621 | 0.041872294 | ISG15, DNAJA1, TRIM21                                 |
| 12 | 11.65049 | 0.042085233 | PLSCR1, TNFSF10, HSP90AA1, PTK2B, EDN1, SOCS1, DNAJ   |
| 5  | 4.854369 | 0.042556145 | SOCS1, IL1RAP, RSAD2, TLR4, ANXA4                     |
| 7  | 6.796117 | 0.043723956 | NMI, ISG15, PTK2B, DTX3L, SOCS1, DNAJA1, TRIM21       |
| 3  | 2.912621 | 0.045082931 | LGALS1, TRIM26, TRIM21                                |
| 12 | 11.65049 | 0.045275982 | IFIT3, PTK2B, MORC3, EDN1, TGM1, TGFBI, MED25, PAK1,  |
| 11 | 10.67961 | 0.046339035 | IFIT3, PTK2B, MORC3, EDN1, TGM1, MED25, PAK1, STAT1   |
| 12 | 11.65049 | 0.046477003 | IFIT3, PLSCR1, ACVR1B, TNFSF10, PTK2B, LGALS1, DNAJA1 |
| 2  | 1.941748 | 0.046521762 | NMI, STAT1                                            |
| 16 | 15.53398 | 0.049290253 | NMI, SOCS1, EDN1, CCL8, STAT1, DAXX, TRIM21, STK3, TN |
| 3  | 2.912621 | 0.050063393 | IRF7, RSAD2, TLR4                                     |
| 7  | 6.796117 | 0.051073521 | TCIRG1, PTK2B, HK3, EDN1, UPP1, CNP, OAS1             |
| 5  | 4.854369 | 0.05180793  | IL1RAP, TRIM26, ANXA4, STK3, TRIM21                   |
| 2  | 1.941748 | 0.052990992 | NMI, IRF7                                             |
| 2  | 1.941748 | 0.052990992 | PARP9, SOCS1                                          |
| 8  | 7.76699  | 0.05507698  | DDX58, MICALL2, SOCS1, IL1RAP, DNAJA1, RSAD2, TLR4, A |
| 4  | 3.883495 | 0.058159533 | IL1RAP, TRIM26, STK3, TRIM21                          |
| 9  | 8.737864 | 0.059395694 | MICALL2, TNFSF10, PTK2B, EDN1, IL1RAP, MED25, TLR4, P |
| 2  | 1.941748 | 0.05941691  | DDX58, IRF7                                           |

|    |          |             |                                                        |
|----|----------|-------------|--------------------------------------------------------|
| 2  | 1.941748 | 0.05941691  | TRIM26, TRIM21                                         |
| 12 | 11.65049 | 0.060806737 | NMI, ISG15, PTK2B, EDN1, SOCS1, DNAJA1, CCL8, PAK1, D  |
| 4  | 3.883495 | 0.0636693   | MORC3, RNF128, STK3, TRIM21                            |
| 5  | 4.854369 | 0.065441638 | PTK2B, DNAJA1, TLR4, PAK1, DAXX                        |
| 15 | 14.56311 | 0.065861906 | NMI, SOCS1, EDN1, IL1RN, CCL8, TLR4, STAT1, ANXA4, STK |
| 17 | 16.50485 | 0.067033674 | TCIRG1, SOCS1, EDN1, UPP1, CCL8, OAS1, CNP, STK3, PPA  |
| 4  | 3.883495 | 0.067087827 | ACVR1B, PTK2B, PAK1, TEC                               |
| 5  | 4.854369 | 0.067158483 | PTK2B, EDN1, TGFBI, PLXND1, STAT1                      |
| 8  | 7.76699  | 0.06776808  | PLSCR1, TNFSF10, PTK2B, EDN1, SOCS1, CCL8, PAK1, STAT  |
| 17 | 16.50485 | 0.068271866 | TCIRG1, SOCS1, EDN1, UPP1, CCL8, OAS1, CNP, STK3, PPA  |
| 8  | 7.76699  | 0.072739681 | NMI, ISG15, EDN1, SOCS1, RNF128, DNAJA1, USP25, TRIM   |
| 5  | 4.854369 | 0.073351602 | SOCS1, IL1RAP, RSAD2, TLR4, ANXA4                      |
| 2  | 1.941748 | 0.078437647 | NMI, RNF128                                            |
| 2  | 1.941748 | 0.078437647 | IRF7, STAT1                                            |
| 2  | 1.941748 | 0.078437647 | PTK2B, LGALS1                                          |
| 4  | 3.883495 | 0.080320996 | TCIRG1, PTK2B, EDN1, OAS1                              |
| 17 | 16.50485 | 0.081178471 | HSP90AA1, NMI, SOCS1, EDN1, MED25, CCL8, STAT1, STK:   |
| 3  | 2.912621 | 0.083590347 | PTK2B, SOCS1, UBR1                                     |
| 10 | 9.708738 | 0.085894113 | TNFSF10, NMI, PTK2B, EDN1, SOCS1, CCL8, PAK1, STAT1, : |
| 6  | 5.825243 | 0.086159448 | DDX58, USP18, DNAJA1, PAK1, STAT1, DAXX                |
| 4  | 3.883495 | 0.087983652 | TNFSF10, LGALS1, TIFA, STAT1                           |
| 4  | 3.883495 | 0.087983652 | RNASET2, UPP1, CNP, ISG20                              |
| 8  | 7.76699  | 0.088305502 | TCIRG1, USP18, ISG15, PTK2B, RNASET2, UBR1, USP25, ISC |
| 16 | 15.53398 | 0.089052405 | HSP90AA1, NMI, SOCS1, EDN1, MED25, CCL8, STAT1, STK:   |
| 4  | 3.883495 | 0.090604779 | TCIRG1, PTK2B, EDN1, OAS1                              |
| 2  | 1.941748 | 0.090906776 | HSP90AA1, SOD2                                         |
| 2  | 1.941748 | 0.090906776 | HSP90AA1, SOD2                                         |
| 2  | 1.941748 | 0.090906776 | PTK2B, LGALS1                                          |
| 3  | 2.912621 | 0.091771039 | PTK2B, CCL8, STAT1                                     |
| 20 | 19.41748 | 0.096215537 | TCIRG1, ETV7, NMI, EDN1, MED25, TRIM26, OAS1, STAT1,   |
| 3  | 2.912621 | 0.098054691 | HSP90AA1, PTK2B, SOD2                                  |

., ACSL6

1AN2A1, ACVR1B, VRK1, USP18, GPR37, B3GALNT1, TGM1, DNAJA1, PRKACB, TNK2, CRY1  
1AN2A1, ACVR1B, VRK1, USP18, GPR37, B3GALNT1, TGM1, DNAJA1, PRKACB, TNK2, CRY1  
D1, TP53INP1

3INP1

, PBX3, ACSL6

3INP1



# rd the DR pigs.

T1, TRIM21, ISG20, DDX58, PLSCR1, PARP9, ISG15, PTK2B, IRF7, LYST, TRAFD1, MX1, MX2, TEC  
LR4, STAT1, TRIM21, ISG20, DDX58, PLSCR1, TNFSF10, PARP9, ISG15, PTK2B, IRF7, LYST, TRAFD1, MX1, M  
<2B, IL1RAP, DNAJA1, SYTL2, MX1, MX2, ANKFY1

CR1, PARP9, PTK2B, IRF7, DNAJA1, PAK1, TRAFD1, USP25, TEC

AS1, STAT1, TRIM21, ISG20, IFIT3, DDX58, PLSCR1, IFIT2, ISG15, PARP9, PTK2B, LYST, IRF7, TRAFD1, MX1,

<58, PLSCR1, ACVR1B, TNFSF10, PTK2B, IRF7, PAK1, TEC

:L8, RSAD2, PAK1, STK3  
IFIT2, ISG15, PTK2B, LYST, IRF7, MX1, MX2  
7, RSAD2, TLR4, TEC  
:L8, RSAD2, PAK1, STK3  
:L8, RSAD2, PAK1, STK3  
5, DAXX, TRIM21  
, TLR4, ANXA4  
.R4, TRAFD1, TEC  
, TLR4, ANXA4

TLR4, TRAFD1

DX58, PLSCR1, IFIT2, ISG15, PTK2B, PLXND1, MX1, MX2, TEC

20  
2, IFIT3, IFIT2, PTK2B, IRF7, DNAJA1, PAK1, MX1

!

TRAFD1  
ANXA4  
20  
STK3, PLSCR1, ACVR1B, TNFSF10, PTK2B, IRF7, DNAJA1, PAK1  
XA4, STK3

!

:

ANXA4  
/21, ISG20  
!

RP9, ISG15, PTK2B, IRF7, XAF1, MX1, MX2  
/21, ISG20

X1, TRIM21, ISG20

20

26, OAS1, MX1, MX2, TRIM21, ISG20

IX2, ISG20

X1, TRIM21, ISG20

26, OAS1, MX1, MX2, TRIM21, ISG20

OAS1, MX1, MX2, ISG20

26, OAS1, MX1, MX2, TRIM21, ISG20

26, OAS1, MX1, MX2, TRIM21, ISG20

OAS1, MX1, TRIM21, ISG20

IX2, ISG20

121, IFIT3, DDX58, IFIT2, USP18, PARP9, ISG15, PTK2B, IRF7, DNAJA1, XAF1, PAK1, USP25, MX1, MX2  
ACVR1B, PARP9, ISG15, PTK2B, IRF7, TRAFD1, TEC

, MX1

OAS1, MX1, MX2, ISG20

OAS1, MX1, MX2, ISG20

OAS1, MX1, MX2, ISG20

3, PLSCR1, TNFSF10, PTK2B, IL1RAP, PAK1, PLXND1

ANXA4, TRIM21, STK3, SOD2, PLSCR1, TNFSF10, PTK2B, IL1RAP, DNAJA1, SYTL2, PAK1, PLXND1

, IFIT2, PTK2B, IRF7, DNAJA1, PAK1, MX1

, XAF1, STAT1, ETV6, STK3, SOD2

, XAF1, STAT1, ETV6, DAXX, STK3, SOD2

IRGL1, CNP, UBR1, USP25, ISG20

A1, CCL8, SYTL2, PAK1, STAT1, SOD2

STAT1, ETV6, STK3, SOD2

, STK3, SOD2, TEC

, XAF1, STAT1, ETV6, STK3, SOD2

IFSF10, ISG15, PTK2B, RNF128, DNAJA1, PAK1, USP25, TEC

INXA4

AK1, ANKFY1

AXX, STK3, TRIM21, TEC

3, ACVR1B, TNFSF10, PTK2B, IRF7, PLXND1, TEC  
1, ACVR1B, MORC3, PTK2B, HK3, DNAJA1, SYTL2, PAK1, TEC

1  
1, ACVR1B, MORC3, PTK2B, HK3, DNAJA1, SYTL2, PAK1, TEC  
I21

3, SOD2, DDX58, PLSCR1, ACVR1B, TNFSF10, PTK2B, IRF7, PAK1, TEC

STK3, TEC

G20  
3, SOD2, DDX58, PLSCR1, TNFSF10, PTK2B, IRF7, PAK1, TEC

DAXX, ANXA4, TRIM21, STK3, SOD2, DDX58, PLSCR1, ACVR1B, PTK2B, IRF7, IL1RAP, ETV6





1X2, TEC

MX2, TEC

## Comparative GO distribution of DEGs involved in the molecular function (N

### IR

| Term_IR                       | Count_DR | %_DR     | Pvalue_DR   | Genes_DR                     |
|-------------------------------|----------|----------|-------------|------------------------------|
| GO:0046872~metal ion binding* | 25       | 21.92982 | 0.061649169 | MICALL2, S100A8, SPOCK2, ZNI |
| GO:0043167~ion binding*       | 26       | 22.80702 | 0.061751911 | BCAT1, MICALL2, S100A8, SPO  |
| GO:0043169~cation binding*    | 25       | 21.92982 | 0.06819427  | MICALL2, S100A8, SPOCK2, ZNI |
| GO:0008270~zinc ion binding*  | 11       | 9.649123 | 0.083715872 | DDX58, MICALL2, MIB1, MAN2   |

|                                      |   |          |             |                |
|--------------------------------------|---|----------|-------------|----------------|
| GO:0050543~icosatetraenoic acid bin  | 2 | 1.754386 | 0.030522386 | S100A8, S100A9 |
| GO:0050544~arachidonic acid binding  | 2 | 1.754386 | 0.030522386 | S100A8, S100A9 |
| GO:0050542~icosanoid binding         | 2 | 1.754386 | 0.030522386 | S100A8, S100A9 |
| GO:0008525~phosphatidylcholine tra   | 2 | 1.754386 | 0.038008012 | PLTP           |
| GO:0036041~long-chain fatty acid bir | 2 | 1.754386 | 0.038008012 | S100A8, S100A9 |
| GO:0005504~fatty acid binding        | 2 | 1.754386 | 0.095872611 | S100A8, S100A9 |

**(F) of IR and DR pigs. Asterisks indicate terms commonly enriched in the IF**

**DR**

| Term_DR                                 | Count_DR | %_DR     | Pvalue_DR   | Genes_DR               |
|-----------------------------------------|----------|----------|-------------|------------------------|
| GO:0046872~metal ion binding*           | 26       | 25.24272 | 0.014807747 | RNASEL, CNDP2, ZNFX1   |
| GO:0043167~ion binding*                 | 26       | 25.24272 | 0.026724658 | RNASEL, CNDP2, ZNFX1   |
| GO:0043169~cation binding*              | 26       | 25.24272 | 0.016808291 | RNASEL, CNDP2, ZNFX1   |
| GO:0008270~zinc ion binding*            | 14       | 13.59223 | 0.003917731 | MICALL2, ZNFX1, CNDF   |
| GO:0004540~ribonuclease activity        | 4        | 3.883495 | 0.008633639 | RNASEL, RNASE4, RNA5   |
| GO:0046914~transition metal ion bindin  | 15       | 14.56311 | 0.009255065 | MICALL2, ZNFX1, CNDF   |
| GO:0097367~carbohydrate derivative bi   | 19       | 18.4466  | 0.015481558 | RNASEL, HSP90AA1, CC   |
| GO:0008242~omega peptidase activity     | 2        | 1.941748 | 0.028365696 | GGH, ASRGL1            |
| GO:0005536~glucose binding              | 2        | 1.941748 | 0.042249186 | SLC2A3, HK3            |
| GO:0030246~carbohydrate binding         | 4        | 3.883495 | 0.047322123 | SLC2A3, LGALS1, HK3, I |
| GO:0005524~ATP binding                  | 13       | 12.62136 | 0.049072178 | DDX58, TOR3A, ACVR1    |
| GO:0032559~adenyl ribonucleotide binc   | 13       | 12.62136 | 0.054599424 | DDX58, TOR3A, ACVR1    |
| GO:0030554~adenyl nucleotide binding    | 13       | 12.62136 | 0.056303505 | DDX58, TOR3A, ACVR1    |
| GO:0035639~purine ribonucleoside tripl  | 15       | 14.56311 | 0.061417412 | RNASEL, HSP90AA1, O/   |
| GO:0001883~purine nucleoside binding    | 15       | 14.56311 | 0.064106289 | RNASEL, HSP90AA1, O/   |
| GO:0032550~purine ribonucleoside binc   | 15       | 14.56311 | 0.064106289 | RNASEL, HSP90AA1, O/   |
| GO:0032549~ribonucleoside binding       | 15       | 14.56311 | 0.064790939 | RNASEL, HSP90AA1, O/   |
| GO:0001882~nucleoside binding           | 15       | 14.56311 | 0.066175239 | RNASEL, HSP90AA1, O/   |
| GO:0032555~purine ribonucleotide bind   | 15       | 14.56311 | 0.070448974 | RNASEL, HSP90AA1, O/   |
| GO:0017076~purine nucleotide binding    | 15       | 14.56311 | 0.07302638  | RNASEL, HSP90AA1, O/   |
| GO:0004518~nuclease activity            | 4        | 3.883495 | 0.073885549 | RNASEL, RNASE4, RNA5   |
| GO:0032553~ribonucleotide binding       | 15       | 14.56311 | 0.075666505 | RNASEL, HSP90AA1, O/   |
| GO:0005518~collagen binding             | 2        | 1.941748 | 0.076106933 | TGFBI, PAK1            |
| GO:0008238~exopeptidase activity        | 3        | 2.912621 | 0.076909987 | CNDP2, GGH, ASRGL1     |
| GO:0004702~receptor signaling protein   | 3        | 2.912621 | 0.087505491 | ACVR1B, PAK1, STK3     |
| GO:0016462~pyrophosphatase activity     | 8        | 7.76699  | 0.090862025 | DDX58, TCIRG1, TOR3A   |
| GO:0016773~phosphotransferase activit   | 8        | 7.76699  | 0.090862025 | ACVR1B, RNASEL, PTK2   |
| GO:0016818~hydrolase activity, acting o | 8        | 7.76699  | 0.091543534 | DDX58, TCIRG1, TOR3A   |
| GO:0016817~hydrolase activity, acting o | 8        | 7.76699  | 0.096395913 | DDX58, TCIRG1, TOR3A   |

## and the DR pigs.

L, RSAD2, OAS1, ISG20, MORC3, DMD, TGM1, RNF128, XAF1, MICALL2, DTX3L, TRIM26, PHF11, UBR1, AI  
L, RSAD2, OAS1, ISG20, MORC3, DMD, TGM1, RNF128, XAF1, MICALL2, DTX3L, TRIM26, PHF11, UBR1, AI  
L, RSAD2, OAS1, ISG20, MORC3, DMD, TGM1, RNF128, XAF1, MICALL2, DTX3L, TRIM26, PHF11, UBR1, AI  
2, DTX3L, TRIM26, PHF11, UBR1, TRIM21, DDX58, MORC3, DMD, RNF128, WHSC1L1, XAF1  
SET2, ISG20  
2, DTX3L, TRIM26, PHF11, UBR1, TRIM21, SOD2, DDX58, MORC3, DMD, WHSC1L1, RNF128, XAF1  
L8, OAS1, TLR4, STK3, DDX58, TOR3A, TNFAIP6, ACVR1B, PTK2B, HK3, DMD, DNAJA1, PAK1, MX1, MX2,

### LGALS8

B, RNASEL, HSP90AA1, PTK2B, HK3, DNAJA1, OAS1, PAK1, STK3, MYO5B, TEC  
B, RNASEL, HSP90AA1, PTK2B, HK3, DNAJA1, OAS1, PAK1, STK3, MYO5B, TEC  
B, RNASEL, HSP90AA1, PTK2B, HK3, DNAJA1, OAS1, PAK1, STK3, MYO5B, TEC  
AS1, STK3, DDX58, TOR3A, ACVR1B, PTK2B, HK3, DNAJA1, PAK1, MX1, MX2, MYO5B, TEC  
AS1, STK3, DDX58, TOR3A, ACVR1B, PTK2B, HK3, DNAJA1, PAK1, MX1, MX2, MYO5B, TEC  
AS1, STK3, DDX58, TOR3A, ACVR1B, PTK2B, HK3, DNAJA1, PAK1, MX1, MX2, MYO5B, TEC  
AS1, STK3, DDX58, TOR3A, ACVR1B, PTK2B, HK3, DNAJA1, PAK1, MX1, MX2, MYO5B, TEC  
AS1, STK3, DDX58, TOR3A, ACVR1B, PTK2B, HK3, DNAJA1, PAK1, MX1, MX2, MYO5B, TEC  
AS1, STK3, DDX58, TOR3A, ACVR1B, PTK2B, HK3, DNAJA1, PAK1, MX1, MX2, MYO5B, TEC  
SET2, ISG20  
AS1, STK3, DDX58, TOR3A, ACVR1B, PTK2B, HK3, DNAJA1, PAK1, MX1, MX2, MYO5B, TEC

\, HSP90AA1, MX1, MX2, MYO5B, PPA1  
!B, HK3, CCL8, PAK1, STK3, TEC  
\, HSP90AA1, MX1, MX2, MYO5B, PPA1  
\, HSP90AA1, MX1, MX2, MYO5B, PPA1

NXA4, TRIM21, STK3, SOD2, PPA1, DDX58, PLSCR1, WHSC1L1, SYTL2, ANKFY1  
NXA4, TRIM21, STK3, SOD2, PPA1, DDX58, PLSCR1, WHSC1L1, SYTL2, ANKFY1  
NXA4, TRIM21, STK3, SOD2, PPA1, DDX58, PLSCR1, WHSC1L1, SYTL2, ANKFY1

MYO5B, TEC

## GO distribution of DEGs involved in the cellular component (CC) of

| Category      | Term                               | Count | %        | PValue   |
|---------------|------------------------------------|-------|----------|----------|
| GOTERM_CC_FAT | GO:0016605~PML body                | 3     | 2.912621 | 0.037943 |
| GOTERM_CC_FAT | GO:0048770~pigment granule         | 3     | 2.912621 | 0.03965  |
| GOTERM_CC_FAT | GO:0042470~melanosome              | 3     | 2.912621 | 0.03965  |
| GOTERM_CC_FAT | GO:0070062~extracellular exosome   | 18    | 17.47573 | 0.077903 |
| GOTERM_CC_FAT | GO:1903561~extracellular vesicle   | 18    | 17.47573 | 0.0828   |
| GOTERM_CC_FAT | GO:0043230~extracellular organelle | 18    | 17.47573 | 0.083185 |
| GOTERM_CC_FAT | GO:0005576~extracellular region    | 26    | 25.24272 | 0.08476  |

## DR pigs

| Genes                                                                | List Total | Pop Hits | Pop Total |
|----------------------------------------------------------------------|------------|----------|-----------|
| MORC3, DAXX, ISG20                                                   | 68         | 41       | 8897      |
| HSP90AA1, SYTL2, CNP                                                 | 68         | 42       | 8897      |
| HSP90AA1, SYTL2, CNP                                                 | 68         | 42       | 8897      |
| SLCO4C1, RNASE4, LGALS1, GGH, LGALS8, CNP, ANXA4, PPA1, TOR3A, ACVI  | 68         | 1590     | 8897      |
| SLCO4C1, RNASE4, LGALS1, GGH, LGALS8, CNP, ANXA4, PPA1, TOR3A, ACVI  | 68         | 1603     | 8897      |
| SLCO4C1, RNASE4, LGALS1, GGH, LGALS8, CNP, ANXA4, PPA1, TOR3A, ACVI  | 68         | 1604     | 8897      |
| EDN1, CCL8, CNP, OAS1, ACVR1B, TOR3A, NANS, ISG15, RNASET2, TGFBI, T | 68         | 2572     | 8897      |

| <b>Fold</b> | <b>Enrich</b> | <b>Bonferroni</b> | <b>Benjamini</b> | <b>FDR</b> |
|-------------|---------------|-------------------|------------------|------------|
| 9.573529    | 0.996473      | 0.996473          | 36.85624         |            |
| 9.345588    | 0.997279      | 0.947837          | 38.17523         |            |
| 9.345588    | 0.997279      | 0.947837          | 38.17523         |            |
| 1.481188    | 0.999993      | 0.980689          | 61.86345         |            |
| 1.469175    | 0.999997      | 0.957349          | 64.20243         |            |
| 1.468259    | 0.999997      | 0.920819          | 64.3807          |            |
| 1.322626    | 0.999998      | 0.884118          | 65.10108         |            |

## Pathway in the DR pigs

| Category     | Term                                            | Count | %        | PValue   |
|--------------|-------------------------------------------------|-------|----------|----------|
| KEGG_PATHWAY | ssc05164:Influenza A                            | 9     | 8.737864 | 6.12E-06 |
| KEGG_PATHWAY | ssc05162:Measles                                | 7     | 6.796117 | 1.35E-04 |
| KEGG_PATHWAY | ssc05168:Herpes simplex infection               | 6     | 5.825243 | 0.004774 |
| KEGG_PATHWAY | ssc04623:Cytosolic DNA-sensing pathway          | 4     | 3.883495 | 0.005995 |
| KEGG_PATHWAY | ssc05160:Hepatitis C                            | 5     | 4.854369 | 0.007275 |
| KEGG_PATHWAY | ssc05161:Hepatitis B                            | 5     | 4.854369 | 0.013181 |
| KEGG_PATHWAY | ssc04062:Chemokine signaling pathway            | 5     | 4.854369 | 0.020727 |
| KEGG_PATHWAY | ssc04060:Cytokine-cytokine receptor interaction | 5     | 4.854369 | 0.045098 |
| KEGG_PATHWAY | ssc04622:RIG-I-like receptor signaling pathway  | 3     | 2.912621 | 0.064589 |

| <b>Genes</b>                                           | <b>List Tr</b> | <b>Pop Hits</b> | <b>Pop Total</b> | <b>Fold Enrich</b> | <b>Bonferroni</b> |
|--------------------------------------------------------|----------------|-----------------|------------------|--------------------|-------------------|
| DDX58, RNASEL, TNFSF10, IRF7, RSAD2, TLR4, OAS1, STAT1 | 44             | 167             | 7030             | 8.610506           | 7.10E-04          |
| DDX58, TNFSF10, IRF7, TLR4, OAS1, STAT1, MX1           | 44             | 132             | 7030             | 8.472796           | 0.015514          |
| DDX58, RNASEL, IRF7, OAS1, STAT1, DAXX                 | 44             | 182             | 7030             | 5.267233           | 0.425962          |
| DDX58, IRF7, TREX1, ZBP1                               | 44             | 61              | 7030             | 10.4769            | 0.502177          |
| DDX58, RNASEL, IRF7, OAS1, STAT1                       | 44             | 127             | 7030             | 6.290265           | 0.571271          |
| DDX58, PTK2B, IRF7, TLR4, STAT1                        | 44             | 151             | 7030             | 5.290488           | 0.785451          |
| PTK2B, CCL8, GNB4, PAK1, STAT1                         | 44             | 173             | 7030             | 4.617709           | 0.911932          |
| ACVR1B, TNFSF10, IL1RAP, CCL8, IL13RA1                 | 44             | 221             | 7030             | 3.614768           | 0.995266          |
| DDX58, ISG15, IRF7                                     | 44             | 68              | 7030             | 7.048797           | 0.999567          |

**Benjamini FDR**

|          |          |
|----------|----------|
| 7.10E-04 | 0.006985 |
| 0.007788 | 0.153666 |
| 0.168912 | 5.312784 |
| 0.16002  | 6.630135 |
| 0.155817 | 7.992231 |
| 0.226273 | 14.04834 |
| 0.29326  | 21.25538 |
| 0.487845 | 40.93197 |
| 0.577087 | 53.31581 |
